# Supplementary material for: Comparison of Nicotine and Toxicant Exposure in Users of Electronic Cigarettes and Combustible Cigarettes
Source: PubMed Central journal article supplement (PMC6324349; doi:10.1001/jamanetworkopen.2018.5937), 2018-12-14
Supplement: jamanetwopen-e185937-s001.pdf [file jamanetwopen-e185937-s001.pdf]

## Supplementary Online Content

Goniewicz ML, Smith DM, Edwards KC, et al. Comparison of nicotine and toxicant exposure in users of electronic cigarettes and combustible cigarettes. *JAMA Netw Open*. 2018;1(8):e185937. doi:10.1001/jamanetworkopen.2018.5937

**eFigure.** Study Inclusion/Exclusion

**eTable 1.** Analytical Limits of Detection (LOD), Biological Half-lives, and Assay Methods for Nicotine and Toxicants Assessed at Wave 1, PATH Study, 2013-2014

**eTable 2.** Biomarkers of Exposure to Tobacco-Related Compounds and Other Chemicals, Among Current Never Users, e-Cigarette Only-Users, Dual Users, and Cigarette-Only Smokers (Normalized for Creatinine, Geometric Means, 95% Confidence Intervals), PATH Wave 1 (2013-2014) (n=5,105)

**eMethods.** Details on Model Building Procedures for Dual User Analysis and Sample Weighting

**eTable 3.** Biomarkers of Exposure to Tobacco-Related Compounds and Other Chemicals, Among Everyday and Someday Users of e-Cigarettes and Cigarettes (Normalized for Creatinine, Geometric Means, 95% Confidence Intervals), PATH Wave 1 (2013-2014) (n=2,658)

**eTable 4.** Biomarkers of Exposure to Tobacco-Related Compounds and Other Chemicals, Among Dual Users (Normalized for Creatinine, Geometric Means, 95% Confidence Intervals), PATH Wave 1 (2013-2014) (n=792)

### eReferences

This supplementary material has been provided by the authors to give readers additional information about their work.

**eFigure.** Study Inclusion/Exclusion

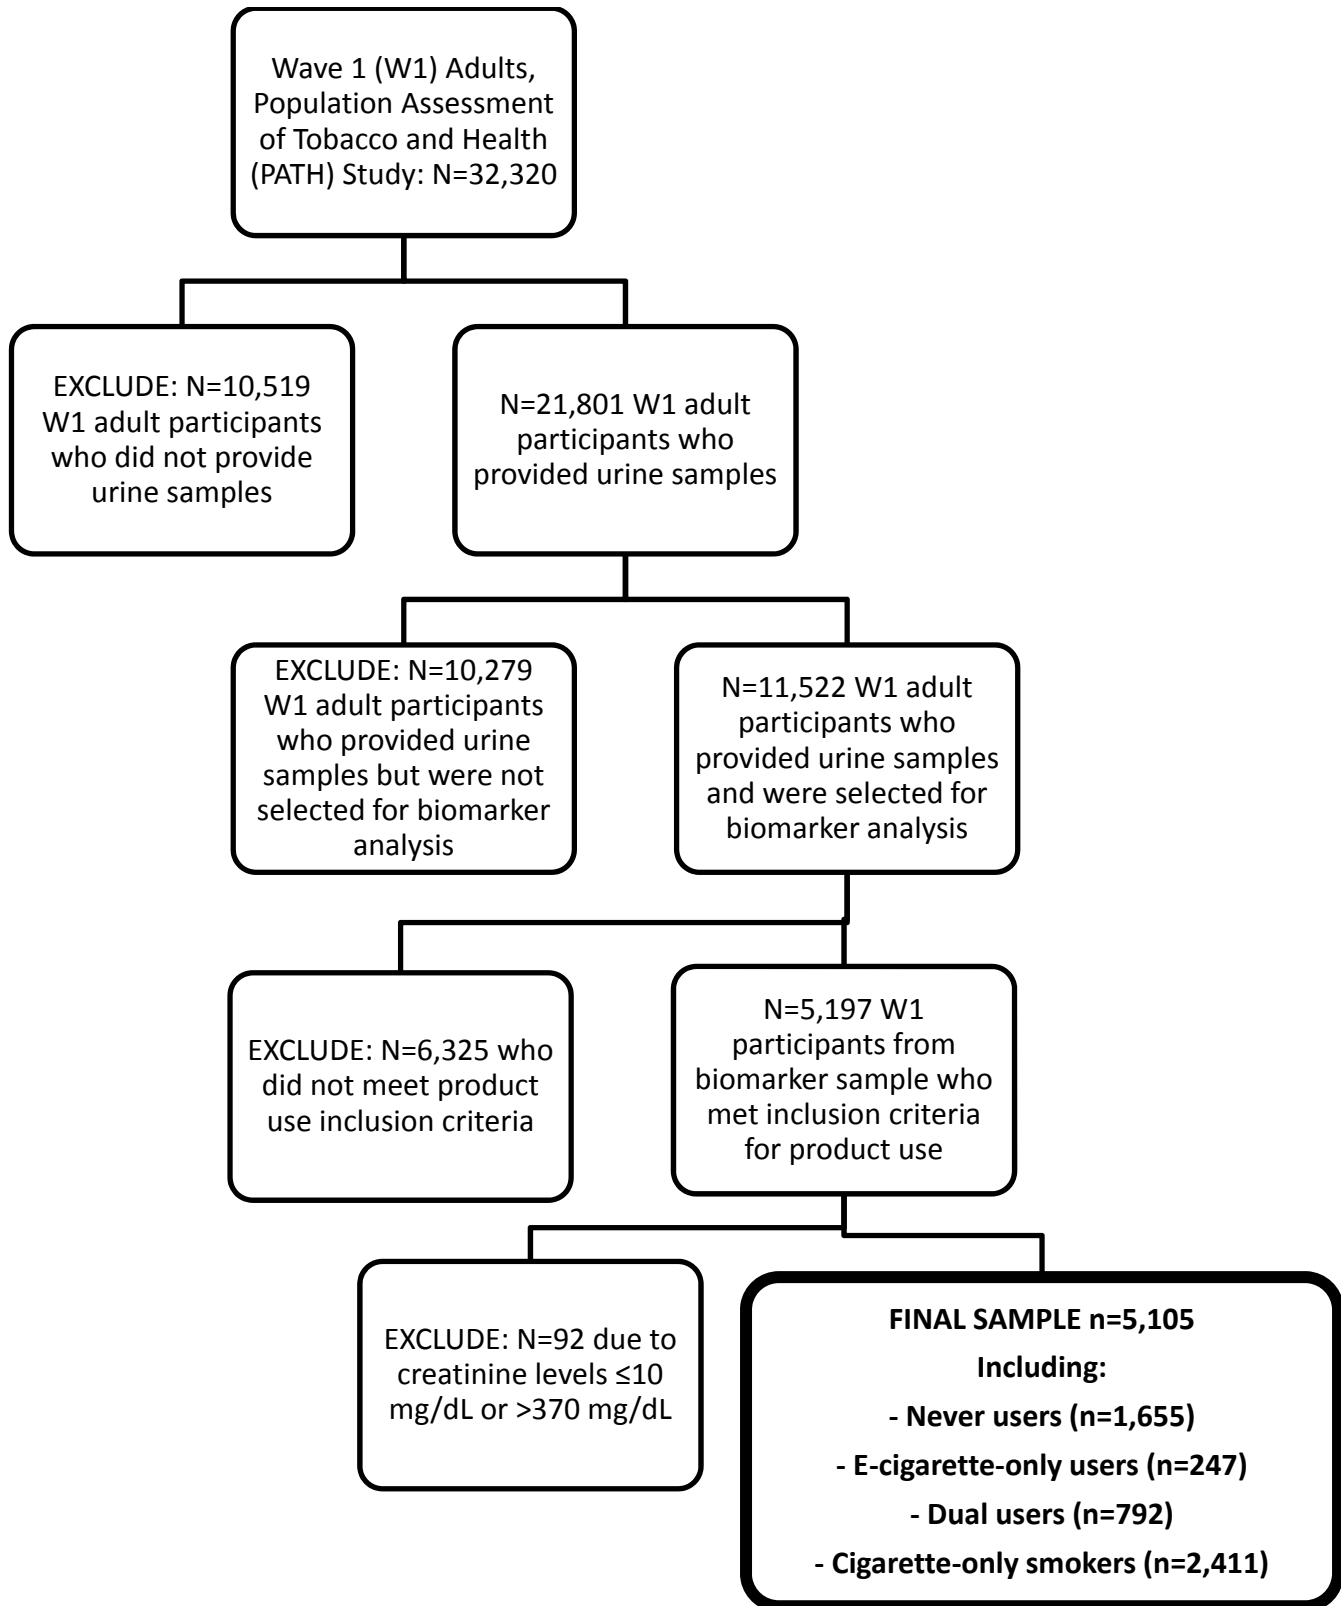

**eTable 1.** Analytical Limits of Detection (LOD), Biological Half-lives, and Assay Methods for Nicotine and Toxicants Assessed at Wave 1, PATH Study, 2013-2014

| Biomarker                                                | Limit of Detection | Biological Half-lives  | Analytical Assay Method                                                                                                                                                               |
|----------------------------------------------------------|--------------------|------------------------|---------------------------------------------------------------------------------------------------------------------------------------------------------------------------------------|
| <b>Urinary Nicotine Metabolites<sup>^1</sup> (ng/mL)</b> |                    |                        |                                                                                                                                                                                       |
| <i>trans</i> -3'-Hydroxycotinine (HCTT)                  | 0.030              | 6.4 hrs                | All nicotine metabolites were assessed using two separate isotope dilution high performance liquid chromatography/ tandem mass spectrometric (HPLC-MS/MS) methods. <sup>2,3</sup>     |
| Cotinine (COTT)                                          | 0.030              | 16-18 hrs              |                                                                                                                                                                                       |
| Nicotine (NICT)                                          | 10.5               | 1-2 hrs                |                                                                                                                                                                                       |
| Cotinine N-oxide (COXT)                                  | 2.02               | N/A                    |                                                                                                                                                                                       |
| Nicotine 1'-oxide (NOXT)                                 | 2.50               | N/A                    |                                                                                                                                                                                       |
| Norcotinine (NCCT)                                       | 1.11               | N/A                    |                                                                                                                                                                                       |
| Nornicotine (NNCT)                                       | 2.50               | N/A                    |                                                                                                                                                                                       |
| <b>Minor Tobacco Alkaloids (ng/mL)</b>                   |                    |                        |                                                                                                                                                                                       |
| Anabasine (ANBT)                                         | 0.51               | 16 hrs                 | All minor tobacco alkaloids were assessed using two separate isotope dilution high performance liquid chromatography/tandem mass spectrometric (HPLC-MS/MS) methods. <sup>2,3</sup>   |
| Anatabine (ANTT)                                         | 0.39               | 10 hrs                 |                                                                                                                                                                                       |
| <b>Arsenic and Arsenic Compounds (ug/L)<sup>^</sup></b>  |                    |                        |                                                                                                                                                                                       |
| Arsenous Acid                                            | 0.12               | 10 hrs                 | All arsenic compounds were assessed using high performance liquid chromatography/inductively coupled plasma dynamic reaction cell mass spectrometry (HPLC-ICP-DRC-MS). <sup>4,5</sup> |
| Arsenic Acid                                             | 0.79               | 10 hrs                 |                                                                                                                                                                                       |
| Dimethylarsinic acid                                     | 1.19               | 10 hrs                 |                                                                                                                                                                                       |
| Monomethylarsonic acid                                   | 0.20               | 10 hrs                 |                                                                                                                                                                                       |
| <b>Tobacco Specific Nitrosamines (TSNAs) (ng/L)</b>      |                    |                        |                                                                                                                                                                                       |
| 4-methylnitrosamino)-4-(3-pyridyl)-1-butanol (NNAL)      | 0.6                | 10.3 days <sup>6</sup> | All TSNAs were assessed using isotope dilution high performance liquid chromatography/atmospheric pressure chemical ionization tandem mass spectrometry (HPLC-MS/MS). <sup>7</sup>    |
| N'-nitrosoanatabine (NNT)                                | 2.8                | N/A                    |                                                                                                                                                                                       |
| N'-nitrosoanatabine (NAT)                                | 4.2                | N/A                    |                                                                                                                                                                                       |
| N'-nitrosoanabasine (NAB)                                | 1.6                | N/A                    |                                                                                                                                                                                       |

| Biomarker                                                                            | Limit of Detection | Biological Half-lives                                        | Analytical Assay Method                                                                                                                                               |
|--------------------------------------------------------------------------------------|--------------------|--------------------------------------------------------------|-----------------------------------------------------------------------------------------------------------------------------------------------------------------------|
| <b>Metals (µg/L)</b>                                                                 |                    |                                                              |                                                                                                                                                                       |
| Beryllium (UBE)                                                                      | 0.016              | Several years                                                | All metals were assessed using inductively coupled plasma mass spectrometry (ICP-MS). <sup>8,9</sup>                                                                  |
| Cadmium (UCD)                                                                        | 0.036              | 13.6 years                                                   |                                                                                                                                                                       |
| Cobalt (UCO)                                                                         | 0.023              | Several days                                                 |                                                                                                                                                                       |
| Manganese (UMN)                                                                      | 0.13               | 39 days                                                      |                                                                                                                                                                       |
| Lead (UPB)                                                                           | 0.03               | 1-2 months in blood & soft tissues, years to decades in bone |                                                                                                                                                                       |
| Strontium (USR)                                                                      | 2.34               | 47.3 hrs                                                     |                                                                                                                                                                       |
| Thallium (UTL)                                                                       | 0.018              | 1-3 days                                                     |                                                                                                                                                                       |
| Uranium (UUR)                                                                        | 0.002              | 24 hrs                                                       |                                                                                                                                                                       |
| <b>Polycyclic Aromatic Hydrocarbons<sup>10</sup> (ng/L)</b>                          |                    |                                                              |                                                                                                                                                                       |
| 1-Naphthol or 1-hydroxynaphthalene (1-NAP)                                           | 60                 | 4.3 hrs                                                      | All PAHs were assessed using enzymatic hydrolysis, on-line solid phase extraction, and isotope dilution liquid chromatography tandem mass spectrometry. <sup>11</sup> |
| 2-Naphthol or 2-hydroxynaphthalene (2-NAP)                                           | 90                 | 9.4 hrs                                                      |                                                                                                                                                                       |
| 3-Hydroxyfluorene (3-FLU)                                                            | 8                  | 8.2 hrs                                                      |                                                                                                                                                                       |
| 2-Hydroxyfluorene (2-FLU)                                                            | 8                  | 2.1 hrs                                                      |                                                                                                                                                                       |
| 1-Hydroxyphenanthrene (1-PHE)                                                        | 9                  | 5.1 hrs                                                      |                                                                                                                                                                       |
| 1-Hydroxypyrene (1-PYR)                                                              | 70                 | 6.0 hrs                                                      |                                                                                                                                                                       |
| 2-Hydroxyphenanthrene and 3-Hydroxyphenanthrene (2-3PHE)                             | 10                 | 4.1 hrs                                                      |                                                                                                                                                                       |
| <b>Volatile Organic Compounds (VOCs) (ng/mL)</b>                                     |                    |                                                              |                                                                                                                                                                       |
| 2-Methylhippuric acid (2MHA) (Xylene)                                                | 5.00               | 34 hrs                                                       | All VOCs were assessed using isotope dilution UPLC-MS/MS. <sup>12,13</sup>                                                                                            |
| 3, 4-Methylhippuric acid (34MH) (Xylene)                                             | 8.00               | 34 hrs                                                       |                                                                                                                                                                       |
| N-Acetyl-S-(2-carbamoyl-ethyl)-L-cysteine (AAMA) (Acrylamide)                        | 2.20               | 11 or 17.4 hrs                                               |                                                                                                                                                                       |
| N-Acetyl-S-(N-methylcarbamoyl)-L-cysteine (AMCA) (N,N-Dimethylformamide/isocyanates) | 6.26               | 23 hrs                                                       |                                                                                                                                                                       |
| N-Acetyl-S-(benzyl)-L-cysteine (BMA) (Toluene)                                       | 0.50               | <10 hrs                                                      |                                                                                                                                                                       |
| N-Acetyl-S-(2-carboxyethyl)-L-cysteine (CEMA) (Acrolein)                             | 6.96               | N/A                                                          |                                                                                                                                                                       |
| N-Acetyl-S-(1-cyano-2-hydroxyethyl)-L-cysteine (CYHA) (Acrylonitrile)                | 2.60               | N/A                                                          |                                                                                                                                                                       |
| N-Acetyl-S-(2-cyanoethyl)-L-cysteine (CYMA) (Acrylonitrile)                          | 0.50               | 8 hrs                                                        |                                                                                                                                                                       |
| N-Acetyl-S-(3,4-dihydroxybutyl)-L-cysteine (DHBM) (1,3-Butadiene)                    | 5.25               | N/A                                                          |                                                                                                                                                                       |
| N-Acetyl-S-(2-carbamoyl-2-hydroxyethyl)-L-cysteine (GAMA) (Acrylamide)               | 9.40               | 19 or 25.1 hrs                                               |                                                                                                                                                                       |
| N-Acetyl-S-(2-hydroxyethyl)-L-cysteine (HEMA) (Acrylonitrile, vinyl)                 | 0.79               | >5 hrs                                                       |                                                                                                                                                                       |

| Biomarker                                                                 | Limit of Detection | Biological Half-lives | Analytical Assay Method |
|---------------------------------------------------------------------------|--------------------|-----------------------|-------------------------|
| chloride, ethylene oxide)                                                 |                    |                       |                         |
| N-Acetyl-S-(2-hydroxypropyl)-L-cysteine (HPM2) (Propylene Oxide)          | 5.30               | N/A                   |                         |
| N-Acetyl-S-(3-hydroxypropyl)-L-cysteine (HPMA) (Acrolein)                 | 13.0               | N/A                   |                         |
| N-Acetyl-S-(3-hydroxypropyl-1-methyl)-L-cysteine (HPMM) (Crotonaldehyde)  | 3.00               | N/A                   |                         |
| N-Acetyl-S-(4-hydroxy-2-methyl-2-buten-1-yl)-L-cysteine (IPM3) (Isoprene) | 0.74               | N/A                   |                         |
| Mandelic acid (MADA)                                                      | 12.0               | 2.1,3.6, or 3.9 hrs   |                         |
| N-Acetyl-S-(4-hydroxy-2-buten-1-yl)-L-cysteine (MHB3) (1,3 Butadiene)     | 0.60               | >9 or <6 hrs*         |                         |
| Phenylglyoxylic acid (PGHA) (Ethylbenzene, styrene)                       | 12.0               | 8.1,8.8 or 10.5 hrs   |                         |
| N-Acetyl-S-(phenyl)-L-cysteine (PMA) (Benzene)                            | 0.60               | 9.1 hrs               |                         |
| 2-Thioxothiazolidine-4-carboxylic acid (TTCA) (Carbon Disulfide)          | 11.2               | 8 hrs                 |                         |

### **Footnotes:**

\* Estimated from animal study. Multiple values indicate areas in which the literature lists multiple half-life values. N/A = “Not Available”

^ Assays were conducted for each of the seven major nicotine metabolites listed in eTable 1. In addition to the nicotine metabolites listed above, “Total Nicotine Equivalents” (TNE-2) was computed and included in statistical analyses as a reflection of systemic nicotine levels for participants. TNE-2 was calculated as the molar sum of cotinine and *trans*-3'-Hydroxycotinine. For arsenic and arsenic compounds, individual assays were conducted for each of the four listed compounds in eTable 1. The analysis used a summary variable, “Total Inorganic Arsenic”, representing the sum of the arsenous acid, arsenic acid, dimethylarsinic acid, and monomethylarsonic acid levels in each urine sample. As these are summary variables, TNE-2 and Total Inorganic Arsenic do not have listings for limits of detection.

**eTable 2:** Biomarkers of Exposure to Tobacco-Related Compounds and Other Chemicals, Among Current Never Users, e-Cigarette Only-Users, Dual Users, and Cigarette-Only Smokers (Normalized for Creatinine, Geometric Means, 95% Confidence Intervals), PATH Wave 1 (2013-2014) (n=5,105)

| Biomarker                                                       | Never users (1,655) (a) |                      |              |              |               | Current e-cigarette-only users (n=247) (b) |                      |              |              |               |
|-----------------------------------------------------------------|-------------------------|----------------------|--------------|--------------|---------------|--------------------------------------------|----------------------|--------------|--------------|---------------|
|                                                                 | N                       | Geo Mean             | 95% CI Lower | 95% CI Upper | % N Above LOD | N                                          | Geo Mean             | 95% CI Lower | 95% CI Upper | % N Above LOD |
| <b>Urinary Nicotine Metabolites (ng/mg creatinine)</b>          |                         |                      |              |              |               |                                            |                      |              |              |               |
| Nicotine Equivalence (TNE2) (nmol/mg)                           | 1,652                   | 0.006 <sup>b</sup>   | 0.005        | 0.007        | 99%           | 247                                        | 2.000 <sup>acd</sup> | 1.1          | 3.5          | 100%          |
| <i>trans</i> -3'-Hydroxycotinine (HCTT)                         | 1,641                   | 6.9E-01 <sup>b</sup> | 6.00E-01     | 8.00E-01     | 98%           | 247                                        | 227.4 <sup>acd</sup> | 128.9        | 401.1        | 100%          |
| Cotinine (COTT)                                                 | 1,644                   | 4.2E-01 <sup>b</sup> | 3.60E-01     | 4.90E-01     | 99%           | 247                                        | 124.3 <sup>acd</sup> | 68.9         | 224.4        | 100%          |
| Nicotine (NICT) <sup>^</sup>                                    | 88                      | 3.1E+01 <sup>b</sup> | 1.20E+01     | 8.00E+01     | 64%           | 179                                        | 423.6 <sup>acd</sup> | 306.7        | 584.9        | 93%           |
| Cotinine N-oxide (COXT) <sup>^</sup>                            | 88                      | 1.4E+01 <sup>b</sup> | 6.80E+00     | 2.80E+01     | 99%           | 179                                        | 117.5 <sup>acd</sup> | 88.2         | 156.5        | 98%           |
| Nicotine 1'-oxide (NOXT) <sup>^</sup>                           | 88                      | 1.1E+01 <sup>b</sup> | 4.20E+00     | 3.10E+01     | 76%           | 179                                        | 143.3 <sup>acd</sup> | 105.3        | 194.9        | 95%           |
| Norcotinine (NCCT) <sup>^</sup>                                 | 88                      | 4.3E+00 <sup>b</sup> | 2.30E+00     | 8.00E+00     | 95%           | 179                                        | 31.93 <sup>acd</sup> | 24.35        | 41.87        | 96%           |
| Nornicotine (NNCT) <sup>^</sup>                                 | 88                      | 3.4E+00 <sup>b</sup> | 1.80E+00     | 6.20E+00     | 35%           | 179                                        | 18.83 <sup>acd</sup> | 14.72        | 24.11        | 86%           |
| <b>Minor Tobacco Alkaloids (ng/mg creatinine)</b>               |                         |                      |              |              |               |                                            |                      |              |              |               |
| Anabasine (ANBT) <sup>^</sup>                                   | 88                      | 0.605                | 0.347        | 1.053        | 29%           | 179                                        | 1.144 <sup>cd</sup>  | 0.876        | 1.492        | 56%           |
| Anatabine (ANTT) <sup>^</sup>                                   | 88                      | 0.615                | 0.306        | 1.234        | 37%           | 179                                        | 0.886 <sup>cd</sup>  | 0.658        | 1.192        | 46%           |
| <b>Arsenic and Arsenic Compounds (ug/g creatinine)</b>          |                         |                      |              |              |               |                                            |                      |              |              |               |
| Total Inorganic Arsenic                                         | 1,653                   | 0.054                | 0.05         | 0.057        | 92%           | 247                                        | 0.053 <sup>d</sup>   | 0.048        | 0.058        | 87%           |
| <b>Tobacco Specific Nitrosamines (TSNAs) (pg/mg creatinine)</b> |                         |                      |              |              |               |                                            |                      |              |              |               |
| 4-methylnitrosamino)-4-(3-pyridyl)-1-butanol (NNAL)             | 1,653                   | 0.921 <sup>b</sup>   | 0.819        | 1.035        | 51%           | 247                                        | 4.887 <sup>ad</sup>  | 3.817        | 6.257        | 90%           |
| N'-nitrosoanatabine (NAT)*                                      | 1,648                   | 2.921 <sup>b</sup>   | 2.739        | 3.114        | 1%            | 246                                        | 3.909 <sup>ad</sup>  | 3.402        | 4.493        | 12%           |
| N'-nitrosoanabasine (NAB)*                                      | 1,655                   | 1.067 <sup>b</sup>   | 1.003        | 1.135        | 2%            | 247                                        | 1.422 <sup>ad</sup>  | 1.256        | 1.61         | 15%           |
| N'-Nitrosornicotine (NNN)*                                      | 1,647                   | 1.923 <sup>b</sup>   | 1.81         | 2.043        | 1%            | 241                                        | 3.471 <sup>ad</sup>  | 3.033        | 3.972        | 34%           |
| <b>Heavy Metals (ng/mg creatinine)</b>                          |                         |                      |              |              |               |                                            |                      |              |              |               |
| Beryllium (UBE)*                                                | 1,653                   | 0.011 <sup>b</sup>   | 0.01         | 0.011        | 3%            | 246                                        | 0.012 <sup>a</sup>   | 0.011        | 0.014        | 9%            |
| Cadmium (UCD)                                                   | 1,652                   | 0.149 <sup>b</sup>   | 0.14         | 0.159        | 93%           | 246                                        | 0.193 <sup>ad</sup>  | 0.165        | 0.225        | 92%           |
| Cobalt (UCO)                                                    | 1,653                   | 0.564                | 0.537        | 0.591        | 100%          | 246                                        | 0.579                | 0.523        | 0.641        | 100%          |
| Manganese (UMN)*                                                | 1,652                   | 0.131                | 0.124        | 0.138        | 47%           | 246                                        | 0.14                 | 0.124        | 0.158        | 47%           |
| Lead (UPB)                                                      | 1,653                   | 0.351 <sup>b</sup>   | 0.33         | 0.373        | 100%          | 246                                        | 0.432 <sup>a</sup>   | 0.382        | 0.488        | 100%          |
| Strontium (USR)                                                 | 1,653                   | 112.7                | 106.8        | 119          | 100%          | 246                                        | 118.9                | 101          | 140          | 100%          |

|                |       |                    |       |       |      |     |                    |       |       |     |
|----------------|-------|--------------------|-------|-------|------|-----|--------------------|-------|-------|-----|
| Thallium (UTL) | 1,652 | 0.172              | 0.164 | 0.18  | 100% | 246 | 0.169              | 0.153 | 0.188 | 99% |
| Uranium (UUR)  | 1,653 | 0.005 <sup>b</sup> | 0.005 | 0.006 | 85%  | 246 | 0.007 <sup>a</sup> | 0.006 | 0.008 | 90% |

**eTable 2 – cont’:** Biomarkers of exposure to tobacco-related compounds and other chemicals, among current never users, e-cigarette only-users, dual users, and cigarette-only smokers (normalized for creatinine, geometric means, 95% confidence intervals), PATH Wave 1 (2013-2014) (n=5,105)

| Biomarker                                                       | Current dual users (n=792) (c) |                      |              |              |               | Current cigarette-only smokers (n=2,411) (d) |                      |              |              |               |
|-----------------------------------------------------------------|--------------------------------|----------------------|--------------|--------------|---------------|----------------------------------------------|----------------------|--------------|--------------|---------------|
|                                                                 | N                              | Geo Mean             | 95% CI Lower | 95% CI Upper | % N Above LOD | N                                            | Geo Mean             | 95% CI Lower | 95% CI Upper | % N Above LOD |
| <b>Urinary Nicotine Metabolites (ng/mg creatinine)</b>          |                                |                      |              |              |               |                                              |                      |              |              |               |
| Nicotine Equivalence (TNE2) (nmol/mg)                           | 792                            | 43.70 <sup>bd</sup>  | 39.8         | 48.1         | 100%          | 2410                                         | 27.90 <sup>bc</sup>  | 23.8         | 32.7         | 100%          |
| <i>trans</i> -3'-Hydroxycotinine (HCTT)                         | 791                            | 4985.7 <sup>bd</sup> | 4533.5       | 5482.8       | 100%          | 2406                                         | 3182.3 <sup>bc</sup> | 2682.7       | 3773.2       | 100%          |
| Cotinine (COTT)                                                 | 792                            | 2858.9 <sup>bd</sup> | 2601.9       | 3141.2       | 100%          | 2410                                         | 1830.9 <sup>bc</sup> | 1577.4       | 2125.1       | 100%          |
| Nicotine (NICT) <sup>^</sup>                                    | 779                            | 1318.7 <sup>b</sup>  | 1172.8       | 1482.8       | 98%           | 2299                                         | 1076.0 <sup>b</sup>  | 967.7        | 1195.2       | 97%           |
| Cotinine N-oxide (COXT) <sup>^</sup>                            | 779                            | 349.7 <sup>bd</sup>  | 326.5        | 374.5        | 100%          | 2301                                         | 297.4 <sup>bc</sup>  | 276.5        | 319.9        | 100%          |
| Nicotine 1'-oxide (NOXT) <sup>^</sup>                           | 779                            | 387.4 <sup>bd</sup>  | 352.6        | 425.6        | 99%           | 2301                                         | 326.4 <sup>bc</sup>  | 302          | 352.7        | 98%           |
| Norcotinine (NCCT) <sup>^</sup>                                 | 779                            | 100.3 <sup>b</sup>   | 93.4         | 107.7        | 100%          | 2301                                         | 90.51 <sup>b</sup>   | 84.95        | 96.43        | 99%           |
| Nornicotine (NNCT) <sup>^</sup>                                 | 779                            | 67.94 <sup>b</sup>   | 62.28        | 74.11        | 97%           | 2293                                         | 60.20 <sup>b</sup>   | 56.04        | 64.67        | 96%           |
| <b>Minor Tobacco Alkaloids (ng/mg creatinine)</b>               |                                |                      |              |              |               |                                              |                      |              |              |               |
| Anabasine (ANBT) <sup>^</sup>                                   | 778                            | 8.231 <sup>b</sup>   | 7.429        | 9.12         | 96%           | 2301                                         | 7.799 <sup>b</sup>   | 7.221        | 8.423        | 95%           |
| Anatabine (ANTT) <sup>^</sup>                                   | 779                            | 13.89 <sup>b</sup>   | 12.35        | 15.61        | 96%           | 2298                                         | 13.02 <sup>b</sup>   | 11.92        | 14.22        | 96%           |
| <b>Arsenic and Arsenic Compounds (ug/g creatinine)</b>          |                                |                      |              |              |               |                                              |                      |              |              |               |
| Total Inorganic Arsenic                                         | 790                            | 0.047                | 0.045        | 0.05         | 78%           | 2409                                         | 0.048 <sup>b</sup>   | 0.046        | 0.05         | 87%           |
| <b>Tobacco Specific Nitrosamines (TSNAs) (pg/mg creatinine)</b> |                                |                      |              |              |               |                                              |                      |              |              |               |
| 4-methylnitrosamino-4-(3-pyridyl)-1-butanol (NNAL)              | 789                            | 262.6 <sup>d</sup>   | 240          | 287.3        | 100%          | 2408                                         | 203.5 <sup>bc</sup>  | 181.7        | 227.9        | 99%           |
| N'-nitrosoanatabine (NAT)*                                      | 776                            | 126.9 <sup>d</sup>   | 111.7        | 144.2        | 93%           | 2383                                         | 96.06 <sup>bc</sup>  | 85.66        | 107.7        | 91%           |
| N'-nitrosoanabasine (NAB)*                                      | 788                            | 20.85 <sup>d</sup>   | 18.62        | 23.34        | 92%           | 2402                                         | 15.67 <sup>bc</sup>  | 14.12        | 17.39        | 88%           |
| N'-Nitrosornicotine (NNN)*                                      | 773                            | 11.78                | 10.66        | 13.01        | 86%           | 2310                                         | 11.80 <sup>b</sup>   | 10.84        | 12.85        | 85%           |
| <b>Heavy Metals (ng/mg creatinine)</b>                          |                                |                      |              |              |               |                                              |                      |              |              |               |
| Beryllium (UBE)*                                                | 790                            | 0.013                | 0.012        | 0.014        | 7%            | 2403                                         | 0.012                | 0.011        | 0.013        | 5%            |
| Cadmium (UCD)                                                   | 790                            | 0.28                 | 0.256        | 0.305        | 96%           | 2403                                         | 0.277 <sup>b</sup>   | 0.259        | 0.297        | 97%           |
| Cobalt (UCO)                                                    | 790                            | 0.6                  | 0.566        | 0.637        | 100%          | 2403                                         | 0.542                | 0.524        | 0.56         | 100%          |

|                  |     |                    |       |       |      |      |                    |       |       |      |
|------------------|-----|--------------------|-------|-------|------|------|--------------------|-------|-------|------|
| Manganese (UMN)* | 790 | 0.153              | 0.143 | 0.165 | 41%  | 2402 | 0.137              | 0.13  | 0.143 | 41%  |
| Lead (UPB)       | 790 | 0.5                | 0.475 | 0.526 | 100% | 2403 | 0.479              | 0.462 | 0.496 | 100% |
| Strontium (USR)  | 787 | 130.5 <sup>d</sup> | 121.3 | 140.5 | 100% | 2400 | 113.7 <sup>c</sup> | 107.3 | 120.6 | 100% |
| Thallium (UTL)   | 790 | 0.163              | 0.156 | 0.17  | 99%  | 2403 | 0.155              | 0.15  | 0.16  | 99%  |
| Uranium (UUR)    | 790 | 0.008 <sup>d</sup> | 0.007 | 0.009 | 89%  | 2403 | 0.007 <sup>c</sup> | 0.006 | 0.008 | 88%  |

**eTable 2 – cont’:** Biomarkers of exposure to tobacco-related compounds and other chemicals, among current never users, e-cigarette only-users, dual users, and cigarette-only smokers (normalized for creatinine, geometric means, 95% confidence intervals), PATH Wave 1 (2013-2014) (n=5,105)

| Biomarker                                                                                     | Never users (1,655) (a) |                    |              |              |               | Current e-cigarette-only users (n=247) (b) |                     |              |              |               |
|-----------------------------------------------------------------------------------------------|-------------------------|--------------------|--------------|--------------|---------------|--------------------------------------------|---------------------|--------------|--------------|---------------|
|                                                                                               | N                       | Geo Mean           | 95% CI Lower | 95% CI Upper | % N Above LOD | N                                          | Geo Mean            | 95% CI Lower | 95% CI Upper | % N Above LOD |
| <b>Polycyclic Aromatic Hydrocarbons (ng/mg creatinine)</b>                                    |                         |                    |              |              |               |                                            |                     |              |              |               |
| 1-Naphthol or 1-hydroxynaphthalene (1-NAP)                                                    | 1,649                   | 1.3992             | 1.28         | 1.529        | 100%          | 247                                        | 1.550 <sup>d</sup>  | 1.216        | 1.975        | 100%          |
| 2-Naphthol or 2-hydroxynaphthalene (2-NAP)                                                    | 1,652                   | 4.6311             | 4.344        | 4.937        | 100%          | 246                                        | 5.287 <sup>d</sup>  | 4.693        | 5.956        | 100%          |
| 3-Hydroxyfluorene (3-FLU)                                                                     | 1,655                   | 0.064              | 0.06         | 0.068        | 99%           | 247                                        | 0.077 <sup>d</sup>  | 0.068        | 0.086        | 98%           |
| 2-Hydroxyfluorene (2-FLU)                                                                     | 1,655                   | 0.167              | 0.158        | 0.177        | 100%          | 247                                        | 0.199 <sup>d</sup>  | 0.178        | 0.222        | 100%          |
| 1-Hydroxyphenanthrene (1-PHE)                                                                 | 1,655                   | 0.106              | 0.101        | 0.112        | 100%          | 247                                        | 0.107 <sup>d</sup>  | 0.096        | 0.12         | 99%           |
| 1-Hydroxypyrene (1-PYR)                                                                       | 1,655                   | 0.128 <sup>b</sup> | 0.121        | 0.136        | 85%           | 247                                        | 0.161 <sup>ad</sup> | 0.143        | 0.181        | 89%           |
| 2-Hydroxyphenanthrene and 3-Hydroxyphenanthrene (2-3PHE)                                      | 1,655                   | 0.129              | 0.123        | 0.135        | 100%          | 247                                        | 0.125 <sup>d</sup>  | 0.113        | 0.139        | 98%           |
| <b>Volatile Organic Compounds (VOC)<sup>s</sup> (ng/mg creatinine)</b>                        |                         |                    |              |              |               |                                            |                     |              |              |               |
| 2-Methylhippuric acid (2MHA) (Xylene)                                                         | 1,507                   | 20.99              | 19.35        | 22.77        | 91%           | 210                                        | 27.77 <sup>d</sup>  | 23.6         | 32.67        | 94%           |
| 3, 4-Methylhippuric acid (34MH) (Xylene)                                                      | 1,569                   | 154.9              | 145.8        | 164.5        | 100%          | 216                                        | 185.1 <sup>d</sup>  | 159          | 215.6        | 100%          |
| N-Acetyl-S-(2-carbamoyl-ethyl)-L-cysteine (AAMA) (Acrylamide)                                 | 1,563                   | 47.28              | 45.03        | 49.65        | 100%          | 215                                        | 56.05 <sup>d</sup>  | 51.07        | 61.5         | 100%          |
| N-Acetyl-S-(N-methylcarbamoyl)-L-cysteine (AMCA) (N,N-Dimethylformamide/isocyanates)          | 1,571                   | 105.1 <sup>b</sup> | 98.26        | 112.3        | 100%          | 216                                        | 153.8 <sup>ad</sup> | 136.1        | 173.8        | 100%          |
| N-Acetyl-S-(benzyl)-L-cysteine (BMA) (Toluene)                                                | 1,571                   | 6.314 <sup>b</sup> | 5.965        | 6.683        | 100%          | 216                                        | 6.985 <sup>a</sup>  | 6.088        | 8.015        | 100%          |
| N-Acetyl-S-(2-carboxyethyl)-L-cysteine (CEMA) (Acrolein)                                      | 1,517                   | 98.14              | 93.89        | 102.6        | 99%           | 198                                        | 108.0 <sup>d</sup>  | 95.93        | 121.6        | 100%          |
| N-Acetyl-S-(1-cyano-2-hydroxyethyl)-L-cysteine (CYHA) (Acrylonitrile)*                        | 1,571                   | 1.870 <sup>b</sup> | 1.766        | 1.981        | 3%            | 216                                        | 2.431 <sup>ad</sup> | 2.114        | 2.794        | 14%           |
| N-Acetyl-S-(2-cyanoethyl)-L-cysteine (CYMA) (Acrylonitrile)                                   | 1,571                   | 1.315 <sup>b</sup> | 1.23         | 1.406        | 86%           | 216                                        | 3.959 <sup>ad</sup> | 3.002        | 5.219        | 94%           |
| N-Acetyl-S-(3,4-dihydroxybutyl)-L-cysteine (DHBM) (1,3-Butadiene)                             | 1,399                   | 359                | 347.7        | 370.6        | 100%          | 189                                        | 360.2 <sup>d</sup>  | 340.9        | 380.4        | 100%          |
| N-Acetyl-S-(2-carbamoyl-2-hydroxyethyl)-L-cysteine (GAMA) (Acrylamide)                        | 1,499                   | 9.022              | 8.584        | 9.482        | 41%           | 203                                        | 9.924 <sup>d</sup>  | 9.076        | 10.85        | 47%           |
| N-Acetyl-S-(2-hydroxyethyl)-L-cysteine (HEMA) (Acrylonitrile, vinyl chloride, ethylene oxide) | 1,426                   | 0.955              | 0.893        | 1.02         | 51%           | 183                                        | 1.076 <sup>d</sup>  | 0.945        | 1.224        | 53%           |
| N-Acetyl-S-(2-hydroxypropyl)-L-cysteine (HPM2) (Propylene Oxide)                              | 1,523                   | 33.79              | 30.63        | 37.26        | 97%           | 214                                        | 34.45 <sup>d</sup>  | 30.12        | 39.4         | 97%           |
| N-Acetyl-S-(3-hydroxypropyl)-L-cysteine (HPMA) (Acrolein)                                     | 1,571                   | 272.4              | 257          | 288.6        | 100%          | 212                                        | 314.8 <sup>d</sup>  | 275.4        | 359.5        | 100%          |



|                                                                           |       |       |       |       |      |     |                    |       |       |      |
|---------------------------------------------------------------------------|-------|-------|-------|-------|------|-----|--------------------|-------|-------|------|
| N-Acetyl-S-(3-hydroxypropyl-1-methyl)-L-cysteine (HPMM) (Crotonaldehyde)  | 1,571 | 457.7 | 433.4 | 483.3 | 100% | 216 | 442.8 <sup>d</sup> | 387.6 | 505.8 | 99%  |
| N-Acetyl-S-(4-hydroxy-2-methyl-2-buten-1-yl)-L-cysteine (IPM3) (Isoprene) | 1,555 | 3.378 | 3.155 | 3.617 | 89%  | 215 | 3.747 <sup>d</sup> | 3.247 | 4.323 | 91%  |
| Mandelic acid (MADA)                                                      | 1,382 | 131.7 | 126.6 | 136.9 | 99%  | 198 | 138.5 <sup>d</sup> | 119.5 | 159.8 | 97%  |
| N-Acetyl-S-(4-hydroxy-2-buten-1-yl)-L-cysteine (MHB3) (1,3-Butadiene)     | 1,571 | 4.543 | 4.348 | 4.745 | 99%  | 216 | 4.308 <sup>d</sup> | 3.843 | 4.829 | 98%  |
| Phenylglyoxylic acid (PGHA) (Ethylbenzene, styrene)                       | 1,468 | 203.3 | 196.5 | 210.2 | 100% | 203 | 223.7 <sup>d</sup> | 197.4 | 253.5 | 100% |
| N-Acetyl-S-(phenyl)-L-cysteine (PMA) (Benzene)                            | 1,571 | 1.038 | 0.967 | 1.114 | 68%  | 216 | 1.007              | 0.9   | 1.125 | 69%  |
| 2-Thioxothiazolidine-4-carboxylic acid (TTCA) (Carbon Disulfide)          | 1,287 | 21.61 | 19.51 | 23.93 | 68%  | 186 | 19.36              | 15.99 | 23.43 | 68%  |

**eTable 2 – cont’:** Biomarkers of exposure to tobacco-related compounds and other chemicals, among current never users, e-cigarette only-users, dual users, and cigarette-only smokers (normalized for creatinine, geometric means, 95% confidence intervals), PATH Wave 1 (2013-2014) (n=5,105)

| Biomarker                                                                            | N   | Current dual users (n=792) (c) |              |              |               | Current cigarette-only smokers (n=2,411) (d) |                     |              |              |               |
|--------------------------------------------------------------------------------------|-----|--------------------------------|--------------|--------------|---------------|----------------------------------------------|---------------------|--------------|--------------|---------------|
|                                                                                      |     | Geo Mean                       | 95% CI Lower | 95% CI Upper | % N Above LOD | N                                            | Geo Mean            | 95% CI Lower | 95% CI Upper | % N Above LOD |
| <b>Polycyclic Aromatic Hydrocarbons (ng/mg creatinine)</b>                           |     |                                |              |              |               |                                              |                     |              |              |               |
| 1-Naphthol or 1-hydroxynaphthalene (1-NAP)                                           | 791 | 13.48 <sup>d</sup>             | 11.91        | 15.25        | 100%          | 2411                                         | 11.11 <sup>bc</sup> | 10.18        | 12.12        | 100%          |
| 2-Naphthol or 2-hydroxynaphthalene (2-NAP)                                           | 791 | 14.79                          | 14.01        | 15.61        | 100%          | 2411                                         | 13.91 <sup>b</sup>  | 13.21        | 14.65        | 100%          |
| 3-Hydroxyfluorene (3-FLU)                                                            | 792 | 0.630 <sup>d</sup>             | 0.59         | 0.673        | 100%          | 2411                                         | 0.568 <sup>bc</sup> | 0.53         | 0.61         | 100%          |
| 2-Hydroxyfluorene (2-FLU)                                                            | 792 | 1.141 <sup>d</sup>             | 1.074        | 1.212        | 100%          | 2411                                         | 1.007 <sup>bc</sup> | 0.947        | 1.071        | 100%          |
| 1-Hydroxyphenanthrene (1-PHE)                                                        | 792 | 0.200 <sup>d</sup>             | 0.191        | 0.21         | 100%          | 2411                                         | 0.178 <sup>bc</sup> | 0.17         | 0.186        | 100%          |
| 1-Hydroxypyrene (1-PYR)                                                              | 792 | 0.355 <sup>d</sup>             | 0.339        | 0.373        | 99%           | 2411                                         | 0.303 <sup>bc</sup> | 0.287        | 0.321        | 97%           |
| 2-Hydroxyphenanthrene and 3-Hydroxyphenanthrene (2-3PHE)                             | 792 | 0.316                          | 0.299        | 0.333        | 100%          | 2411                                         | 0.303 <sup>b</sup>  | 0.289        | 0.318        | 100%          |
| <b>Volatile Organic Compounds (VOC)<sup>§</sup> (ng/mg creatinine)</b>               |     |                                |              |              |               |                                              |                     |              |              |               |
| 2-Methylhippuric acid (2MHA) (Xylene)                                                | 736 | 109.3                          | 101.6        | 117.6        | 99%           | 2274                                         | 98.769 <sup>b</sup> | 91.78        | 106.1        | 99%           |
| 3, 4-Methylhippuric acid (34MH) (Xylene)                                             | 769 | 758.4 <sup>d</sup>             | 710.4        | 809.6        | 100%          | 2320                                         | 678.4 <sup>bc</sup> | 633.6        | 726.2        | 100%          |
| N-Acetyl-S-(2-carbamoyl-ethyl)-L-cysteine (AAMA) (Acrylamide)                        | 764 | 144.0                          | 136.4        | 151.9        | 100%          | 2303                                         | 136.4 <sup>b</sup>  | 129.3        | 143.8        | 100%          |
| N-Acetyl-S-(N-methylcarbamoyl)-L-cysteine (AMCA) (N,N-Dimethylformamide/isocyanates) | 767 | 550.3 <sup>d</sup>             | 519.2        | 583.2        | 100%          | 2290                                         | 482.9 <sup>bc</sup> | 454          | 513.7        | 100%          |
| N-Acetyl-S-(benzyl)-L-cysteine (BMA) (Toluene)                                       | 767 | 7.394 <sup>d</sup>             | 6.836        | 7.998        | 100%          | 2309                                         | 6.696 <sup>c</sup>  | 6.238        | 7.188        | 100%          |
| N-Acetyl-S-(2-carboxyethyl)-L-cysteine (CEMA) (Acrolein)                             | 739 | 302.0 <sup>d</sup>             | 283.3        | 321.8        | 100%          | 2176                                         | 271.5 <sup>bc</sup> | 255.1        | 289          | 100%          |
| N-Acetyl-S-(1-cyano-2-hydroxyethyl)-L-cysteine (CYHA) (Acrylonitrile)*               | 769 | 25.09                          | 22.82        | 27.58        | 92%           | 2321                                         | 21.80 <sup>b</sup>  | 20.05        | 23.69        | 88%           |
| N-Acetyl-S-(2-cyanoethyl)-L-cysteine (CYMA) (Acrylonitrile)                          | 769 | 146.2 <sup>d</sup>             | 133.8        | 159.8        | 100%          | 2321                                         | 123.9 <sup>bc</sup> | 109.9        | 139.7        | 99%           |
| N-Acetyl-S-(3,4-dihydroxybutyl)-L-cysteine (DHBM) (1,3-Butadiene)                    | 732 | 532.7 <sup>d</sup>             | 514.3        | 551.7        | 100%          | 2066                                         | 499.8 <sup>bc</sup> | 481.1        | 519.1        | 100%          |
| N-Acetyl-S-(2-carbamoyl-2-hydroxyethyl)-L-cysteine (GAMA) (Acrylamide)               | 717 | 18.52                          | 17.57        | 19.52        | 75%           | 2174                                         | 17.33 <sup>b</sup>  | 16.49        | 18.21        | 74%           |

|                                                                                               |     |                     |        |        |      |      |                      |        |        |      |
|-----------------------------------------------------------------------------------------------|-----|---------------------|--------|--------|------|------|----------------------|--------|--------|------|
| N-Acetyl-S-(2-hydroxyethyl)-L-cysteine (HEMA) (Acrylonitrile, vinyl chloride, ethylene oxide) | 701 | 3.194 <sup>d</sup>  | 2.936  | 3.475  | 88%  | 1988 | 2.744 <sup>bc</sup>  | 2.545  | 2.958  | 83%  |
| N-Acetyl-S-(2-hydroxypropyl)-L-cysteine (HPM2) (Propylene Oxide)                              | 767 | 84.13 <sup>d</sup>  | 78.12  | 90.6   | 100% | 2301 | 71.10 <sup>bc</sup>  | 67.59  | 74.8   | 99%  |
| N-Acetyl-S-(3-hydroxypropyl)-L-cysteine (HPMA) (Acrolein)                                     | 767 | 1317.8 <sup>d</sup> | 1225   | 1417.7 | 100% | 2284 | 1143.5 <sup>bc</sup> | 1064.3 | 1228.6 | 100% |
| N-Acetyl-S-(3-hydroxypropyl-1-methyl)-L-cysteine (HPMM) (Crotonaldehyde)                      | 769 | 2707.7 <sup>d</sup> | 2515.8 | 2914.3 | 100% | 2321 | 2359.3 <sup>bc</sup> | 2188.2 | 2543.8 | 100% |
| N-Acetyl-S-(4-hydroxy-2-methyl-2-buten-1-yl)-L-cysteine (IPM3) (Isoprene)                     | 768 | 39.79 <sup>d</sup>  | 36.33  | 43.56  | 99%  | 2316 | 33.50 <sup>bc</sup>  | 30.69  | 36.56  | 99%  |
| Mandelic acid (MADA)                                                                          | 734 | 287.8               | 274.4  | 301.9  | 99%  | 2112 | 279.3 <sup>b</sup>   | 268.1  | 290.8  | 100% |
| N-Acetyl-S-(4-hydroxy-2-buten-1-yl)-L-cysteine (MHB3) (1,3-Butadiene)                         | 769 | 31.92 <sup>d</sup>  | 29.64  | 34.38  | 100% | 2321 | 27.90 <sup>bc</sup>  | 26.04  | 29.89  | 100% |
| Phenylglyoxylic acid (PGHA) (Ethylbenzene, styrene)                                           | 738 | 416.5 <sup>d</sup>  | 399    | 434.8  | 100% | 2192 | 375.8 <sup>bc</sup>  | 360.3  | 391.8  | 100% |
| N-Acetyl-S-(phenyl)-L-cysteine (PMA) (Benzene)                                                | 769 | 1.071               | 1.017  | 1.127  | 64%  | 2321 | 1.090                | 1.035  | 1.147  | 69%  |
| 2-Thiothiazolidine-4-carboxylic acid (TTCA) (Carbon Disulfide)                                | 713 | 22.89               | 20.98  | 24.99  | 75%  | 2014 | 21.91                | 20.52  | 23.38  | 74%  |

### **Footnotes:**

N reflects total number of cases included in estimate (excluding participants with results outside of quality control standards.) \*Indicates analyte with >40% of all values falling below Limit of Detection (LOD) for select group. % LOD reflects proportion among cases included in estimate.

^ Detection rates for these metabolites only apply to participants who had urinary cotinine levels greater than 20 ng/L, which is reflected in the sample size for each biomarker.

Weighted estimates; geometric mean calculated by  $\exp(\text{mean of log transformed [biomarker value/creatinine value]})$ . Some VOC laboratory results were outstanding at the time these analyses were conducted, so weighted estimates may not accurately reflect values in the target population.

Total Nicotine Equivalents (TNE2) calculated by taking molar sum of trans-3'-hydroxycotinine and cotinine divided by urinary creatinine. Geometric means expressed to four significant figures if under 1000; geometric means over 1000 expressed to five significant figures.

Red text denotes values with RSE>30% or denominator <50. Superscript letters denote statistically significant differences between tobacco use groups based on results from linear regression models adjusted for urinary creatinine, age, sex, ethnicity, education, SHS exposure, past 30 day marijuana use.(p<0.05). Analyses comparing dual users and cigarette-only smokers also included CPD as a control variable. a=significantly different from never users, b=significantly different from e-cigarette-only users, c=significantly different from dual users, d=significantly different cigarette-only users.

§ VOC information presented as Biomarker Name (Lab Code) (Parent Compound)

"Never users"= "No" to lifetime use of any tobacco product; " E-cigarette-only Users"=Reported "Yes" to current everyday/someday use of e-cigarettes, "No" to current use of all other tobacco products; " Dual Users"=Reported "Yes" to current everyday/someday use of tobacco cigarettes and e-cigarettes, "No" to current use of all other tobacco products; " Cigarette-only Smokers"=Reported "Yes" to current everyday/someday use of cigarettes, "No" to current use of all other tobacco products. All user groups reported no past three day use of Nicotine Replacement Therapies (NRT).

## **eMethods. Details on Model Building Procedures for Dual User Analysis and Sample Weighting**

**Dual User Models:** All models examining dual users adjusted for CPD in addition to covariates listed in *Methods*. Models utilized multivariable linear regression modelling, using log transformed biomarker data as outcomes, and adjusted for urinary creatinine, demographic covariates, CPD, SHS exposure, past 30 day marijuana use, and a categorical variable indicating dual user status (1- everyday smoker/everyday e-cigarette user, 2- everyday e-cigarette user/somedays smoker, 3- everyday smoker/somedays e-cigarette user, 4 - somedays smoker/somedays e-cigarette user). Models were run using the highest exposure level (Group 1, everyday smokers/everyday e-cigarette users) and Group 2, “everyday smokers, somedays e-cigarette users” as the referent categories.

**Weights:** Since the biospecimen data represent a subsample of adults, specific urine weights were needed to account for potential differences between the full set of Adult Interview respondents and the set of adults with analyzed biospecimens. Weighting procedures are outlined in <http://doi.org/10.3886/ICPSR36840.userguide>.

**eTable 3.** Biomarkers of Exposure to Tobacco-Related Compounds and Other Chemicals, Among Everyday and Someday Users of e-Cigarettes and Cigarettes (normalized for creatinine, geometric means, 95% confidence intervals), PATH Wave 1 (2013-2014) (n=2,658)

| Biomarker                                                       | Current e-cigarette-only users (n=247) |          |              |              |               |                        |          |              |              |               |
|-----------------------------------------------------------------|----------------------------------------|----------|--------------|--------------|---------------|------------------------|----------|--------------|--------------|---------------|
|                                                                 | Everyday users (n=147)                 |          |              |              |               | Somedays users (n=100) |          |              |              |               |
|                                                                 | N                                      | Geo Mean | 95% CI Lower | 95% CI Upper | % N Above LOD | N                      | Geo Mean | 95% CI Lower | 95% CI Upper | % N Above LOD |
| <b>Urinary Nicotine Metabolites (ng/mg creatinine)</b>          |                                        |          |              |              |               |                        |          |              |              |               |
| Nicotine Equivalence (nmol/mg)                                  | 147                                    | 22.95*   | 16.35        | 32.23        | 100%          | 100                    | 0.092#   | 0.049        | 0.171        | 100%          |
| <i>trans</i> -3'-Hydroxycotinine (HCTT)                         | 147                                    | 2547.7*  | 1803.7       | 3598.6       | 100%          | 100                    | 10.89#   | 5.96         | 19.92        | 100%          |
| Cotinine (COTT)                                                 | 147                                    | 1480.5*  | 1035.6       | 2116.4       | 100%          | 100                    | 5.513#   | 2.845        | 10.681       | 100%          |
| Nicotine (NICT)^                                                | 143                                    | 684.4*   | 519.3        | 902.1        | 97%           | 36                     | 64.77#   | 29.76        | 140.9        | 77%           |
| Cotinine N-oxide (COXT)^                                        | 143                                    | 181.7*   | 142.5        | 231.6        | 100%          | 36                     | 21.33#   | 10.59        | 43.01        | 89%           |
| Nicotine 1'-oxide (NOXT)^                                       | 143                                    | 237.3*   | 182.9        | 307.9        | 99%           | 36                     | 19.87#   | 9.221        | 42.8         | 77%           |
| Norcotinine (NCCT)^                                             | 143                                    | 47.66*   | 37.37        | 60.79        | 99%           | 36                     | 6.651#   | 3.535        | 12.51        | 85%           |
| Nornicotine (NNCT)^                                             | 143                                    | 26.72*   | 21.31        | 33.51        | 93%           | 36                     | 4.788#   | 2.864        | 8.006        | 58%           |
| <b>Minor Tobacco Alkaloids (ng/mg creatinine)</b>               |                                        |          |              |              |               |                        |          |              |              |               |
| Anabasine (ANBT)^                                               | 143                                    | 1.325*   | 0.997        | 1.758        | 59%           | 36                     | 0.644    | 0.405        | 10.26        | 41%           |
| Anatabine (ANTT)*^                                              | 143                                    | 1.001*   | 0.731        | 1.371        | 50%           | 36                     | 0.55     | 0.305        | 9.898        | 32%           |
| <b>Arsenic and Arsenic Compounds (ug/g creatinine)</b>          |                                        |          |              |              |               |                        |          |              |              |               |
| Total Inorganic Arsenic                                         | 147                                    | 0.054*   | 0.048        | 0.061        | 86%           | 100                    | 0.052    | 0.045        | 0.06         | 90%           |
| <b>Tobacco Specific Nitrosamines (TSNAs) (pg/mg creatinine)</b> |                                        |          |              |              |               |                        |          |              |              |               |
| 4-methylnitrosamino-4-(3-pyridyl)-1-butanol (NNAL)              | 147                                    | 6.629*   | 5.083        | 8.645        | 93%           | 100                    | 3.33     | 2.275        | 4.875        | 86%           |
| N'-nitrosoanatabine (NAT)*                                      | 146                                    | 4.366*   | 3.725        | 5.117        | 15%           | 100                    | 3.407    | 2.743        | 4.233        | 8%            |
| N'-nitrosoanabasine (NAB)*                                      | 147                                    | 1.623*   | 1.395        | 1.89         | 21%           | 100                    | 1.203#   | 0.992        | 1.459        | 8%            |
| N'-Nitrosoanornicotine (NNN)*                                   | 142                                    | 4.934*   | 4.123        | 5.904        | 54%           | 99                     | 2.215#   | 1.86         | 2.637        | 9%            |
| <b>Heavy Metals (ng/mg creatinine)</b>                          |                                        |          |              |              |               |                        |          |              |              |               |
| Beryllium (UBE)*                                                | 147                                    | 0.013    | 0.011        | 0.014        | 5%            | 99                     | 0.012    | 0.01         | 0.014        | 14%           |
| Cadmium (UCD)                                                   | 147                                    | 0.258    | 0.219        | 0.305        | 97%           | 99                     | 0.133    | 0.102        | 0.173        | 87%           |
| Cobalt (UCO)                                                    | 147                                    | 0.629*   | 0.56         | 0.705        | 100%          | 99                     | 0.521    | 0.441        | 0.615        | 100%          |
| Manganese (UMN)*                                                | 147                                    | 0.141    | 0.125        | 0.159        | 44%           | 99                     | 0.139    | 0.112        | 0.172        | 53%           |
| Lead (UPB)                                                      | 147                                    | 0.514    | 0.433        | 0.609        | 99%           | 99                     | 0.346#   | 0.289        | 0.414        | 100%          |
| Strontium (USR)                                                 | 147                                    | 144.6*   | 125.2        | 167.1        | 100%          | 99                     | 92.73#   | 69.47        | 123.78       | 100%          |
| Thallium (UTL)                                                  | 147                                    | 0.179*   | 0.154        | 0.207        | 100%          | 99                     | 0.158    | 0.14         | 0.179        | 99%           |

|               |     |       |       |       |     |    |       |       |       |     |
|---------------|-----|-------|-------|-------|-----|----|-------|-------|-------|-----|
| Uranium (UUR) | 147 | 0.007 | 0.006 | 0.008 | 85% | 99 | 0.007 | 0.006 | 0.008 | 96% |
|---------------|-----|-------|-------|-------|-----|----|-------|-------|-------|-----|

**eTable 3 – cont’:** Biomarkers of exposure to tobacco-related compounds and other chemicals, among everyday and someday users of e-cigarettes and cigarettes (normalized for creatinine, geometric means, 95% confidence intervals), PATH Wave 1 (2013-2014) (n=2,658)

| Biomarker                                                       | Current Cigarette-only Smokers (n=2,411) |          |              |              |               |                        |          |              |              |               |
|-----------------------------------------------------------------|------------------------------------------|----------|--------------|--------------|---------------|------------------------|----------|--------------|--------------|---------------|
|                                                                 | Everyday users (n=1,975)                 |          |              |              |               | Somedays users (n=436) |          |              |              |               |
|                                                                 | N                                        | Geo Mean | 95% CI Lower | 95% CI Upper | % N Above LOD | N                      | Geo Mean | 95% CI Lower | 95% CI Upper | % N Above LOD |
| <b>Urinary Nicotine Metabolites (ng/mg creatinine)</b>          |                                          |          |              |              |               |                        |          |              |              |               |
| Nicotine Equivalence (nmol/mg)                                  | 1,974                                    | 45.94#   | 42.61        | 49.53        | 100%          | 436                    | 2.082*#  | 1.29         | 3.4          | 100%          |
| <i>trans</i> -3'-Hydroxycotinine (HCTT)                         | 1,973                                    | 5189.6#  | 4767.2       | 5649.4       | 100%          | 433                    | 243.8*#  | 149.1        | 398.7        | 100%          |
| Cotinine (COTT)                                                 | 1,974                                    | 3007.2#  | 2806.1       | 3222.6       | 100%          | 436                    | 137.8*#  | 85.72        | 221.6        | 100%          |
| Nicotine (NICT)^                                                | 1957                                     | 1438.6#  | 1312.3       | 1577.4       | 100%          | 342                    | 144.5*#  | 106          | 197.1        | 81%           |
| Cotinine N-oxide (COXT)^                                        | 1959                                     | 366.4#   | 345.6        | 388.5        | 100%          | 342                    | 70.36*#  | 59.6         | 83.05        | 99%           |
| Nicotine 1'-oxide (NOXT)^                                       | 1959                                     | 428.1#   | 400.9        | 457          | 100%          | 342                    | 50.15*#  | 36.66        | 68.6         | 89%           |
| Norcotinine (NCCT)^                                             | 1959                                     | 111.8#   | 106.3        | 117.5        | 100%          | 342                    | 21.11*#  | 17.81        | 25.02        | 96%           |
| Nornicotine (NNCT)^                                             | 1952                                     | 75.58#   | 71.09        | 80.36        | 100%          | 341                    | 12.60*#  | 10.21        | 15.53        | 74%           |
| <b>Minor Tobacco Alkaloids (ng/mg creatinine)</b>               |                                          |          |              |              |               |                        |          |              |              |               |
| Anabasine (ANBT)^                                               | 1959                                     | 9.679#   | 9.015        | 10.39        | 99%           | 342                    | 1.757*#  | 1.48         | 2.086        | 69%           |
| Anatabine (ANTT)*^                                              | 1957                                     | 16.71#   | 15.4         | 18.14        | 99%           | 341                    | 2.319*#  | 1.824        | 2.948        | 72%           |
| <b>Arsenic and Arsenic Compounds (ug/g creatinine)</b>          |                                          |          |              |              |               |                        |          |              |              |               |
| Total Inorganic Arsenic                                         | 1973                                     | 0.047#   | 0.045        | 0.049        | 86%           | 436                    | 0.052*   | 0.047        | 0.056        | 91%           |
| <b>Tobacco Specific Nitrosamines (TSNAs) (pg/mg creatinine)</b> |                                          |          |              |              |               |                        |          |              |              |               |
| 4-methylnitrosamino-4-(3-pyridyl)-1-butanol (NNAL)              | 1973                                     | 298.7#   | 276          | 323.2        | 100%          | 435                    | 27.50*#  | 21.92        | 34.51        | 96%           |
| N'-nitrosoanatabine (NAT)*                                      | 1950                                     | 140.0#   | 127.7        | 153.5        | 98%           | 433                    | 13.56*#  | 10.86        | 16.93        | 54%           |
| N'-nitrosoanabasine (NAB)*                                      | 1966                                     | 21.20#   | 19.34        | 23.24        | 95%           | 436                    | 3.283*#  | 2.787        | 3.867        | 51%           |
| N'-Nitroso-nornicotine (NNN)*                                   | 1883                                     | 14.91#   | 13.83        | 16.08        | 94%           | 427                    | 3.556*   | 3.176        | 3.982        | 41%           |
| <b>Heavy Metals (ng/mg creatinine)</b>                          |                                          |          |              |              |               |                        |          |              |              |               |
| Beryllium (UBE)*                                                | 1967                                     | 0.012    | 0.012        | 0.013        | 5%            | 436                    | 0.011    | 0.01         | 0.012        | 6%            |
| Cadmium (UCD)                                                   | 1967                                     | 0.313    | 0.294        | 0.334        | 97%           | 436                    | 0.146*#  | 0.124        | 0.173        | 92%           |
| Cobalt (UCO)                                                    | 1967                                     | 0.547#   | 0.529        | 0.567        | 100%          | 436                    | 0.513#   | 0.466        | 0.565        | 100%          |
| Manganese (UMN)*                                                | 1966                                     | 0.14     | 0.133        | 0.148        | 41%           | 436                    | 0.12     | 0.108        | 0.133        | 39%           |
| Lead (UPB)                                                      | 1967                                     | 0.496    | 0.476        | 0.517        | 100%          | 436                    | 0.400#   | 0.375        | 0.426        | 100%          |

|                 |      |        |       |       |      |     |        |       |       |      |
|-----------------|------|--------|-------|-------|------|-----|--------|-------|-------|------|
| Strontium (USR) | 1965 | 114.1# | 107.1 | 121.5 | 100% | 435 | 112.0# | 99.91 | 125.5 | 100% |
| Thallium (UTL)  | 1967 | 0.154# | 0.148 | 0.159 | 99%  | 436 | 0.162  | 0.152 | 0.173 | 100% |
| Uranium (UUR)   | 1967 | 0.007  | 0.006 | 0.008 | 89%  | 436 | 0.005  | 0.004 | 0.007 | 83%  |

**eTable 3 – cont’:** Biomarkers of exposure to tobacco-related compounds and other chemicals, among everyday and someday users of e-cigarettes and cigarettes (normalized for creatinine, geometric means, 95% confidence intervals), PATH Wave 1 (2013-2014) (n=2,658)

| Biomarker                                                                                     | Current e-cigarette-only users (n=247) |          |              |              |               |                        |          |              |              |               |
|-----------------------------------------------------------------------------------------------|----------------------------------------|----------|--------------|--------------|---------------|------------------------|----------|--------------|--------------|---------------|
|                                                                                               | Everyday users (n=147)                 |          |              |              |               | Somedays users (n=100) |          |              |              |               |
|                                                                                               | N                                      | Geo Mean | 95% CI Lower | 95% CI Upper | % N Above LOD | N                      | Geo Mean | 95% CI Lower | 95% CI Upper | % N Above LOD |
| <b>Polycyclic Aromatic Hydrocarbons (ng/mg creatinine)</b>                                    |                                        |          |              |              |               |                        |          |              |              |               |
| 1-Naphthol or 1-hydroxynaphthalene (1-NAP)                                                    | 147                                    | 1.640*   | 1.259        | 2.136        | 99%           | 100                    | 1.445    | 0.93         | 2.243        | 100%          |
| 2-Naphthol or 2-hydroxynaphthalene (2-NAP)                                                    | 146                                    | 5.080*   | 4.391        | 5.877        | 100%          | 100                    | 5.556    | 4.678        | 6.596        | 100%          |
| 3-Hydroxyfluorene (3-FLU)                                                                     | 147                                    | 0.082*   | 0.07         | 0.096        | 96%           | 100                    | 0.071    | 0.058        | 0.087        | 100%          |
| 2-Hydroxyfluorene (2-FLU)                                                                     | 147                                    | 0.214*   | 0.185        | 0.247        | 100%          | 100                    | 0.181    | 0.155        | 0.21         | 100%          |
| 1-Hydroxyphenanthrene (1-PHE)                                                                 | 147                                    | 0.117*   | 0.102        | 0.134        | 100%          | 100                    | 0.097    | 0.082        | 0.114        | 99%           |
| 1-Hydroxypyrene (1-PYR)                                                                       | 147                                    | 0.172*   | 0.147        | 0.201        | 88%           | 100                    | 0.148    | 0.126        | 0.173        | 90%           |
| 2-Hydroxyphenanthrene and 3-Hydroxyphenanthrene (2-3PHE)                                      | 147                                    | 0.132*   | 0.118        | 0.149        | 98%           | 100                    | 0.116    | 0.096        | 0.14         | 99%           |
| <b>Volatile Organic Compounds (VOC)<sup>§</sup> (ng/mg creatinine)</b>                        |                                        |          |              |              |               |                        |          |              |              |               |
| 2-Methylhippuric acid (2MHA) (Xylene)                                                         | 118                                    | 33.62*   | 26.56        | 42.54        | 92%           | 92                     | 22.66    | 18.37        | 27.95        | 96%           |
| 3, 4-Methylhippuric acid (34MH) (Xylene)                                                      | 123                                    | 206.5*   | 169.1        | 252.1        | 100%          | 93                     | 164.2    | 129.9        | 207.5        | 100%          |
| N-Acetyl-S-(2-carbamoylethyl)-L-cysteine (AAMA) (Acrylamide)                                  | 123                                    | 61.85*   | 54.23        | 70.53        | 100%          | 92                     | 50.17    | 43.9         | 57.33        | 100%          |
| N-Acetyl-S-(N-methylcarbamoyl)-L-cysteine (AMCA) (N,N-Dimethylformamide/isocyanates)          | 123                                    | 203.8*   | 177.1        | 234.4        | 100%          | 93                     | 112.6    | 92.2         | 137.6        | 100%          |
| N-Acetyl-S-(benzyl)-L-cysteine (BMA) (Toluene)                                                | 123                                    | 7.088    | 5.812        | 8.644        | 100%          | 93                     | 6.876    | 5.66         | 8.35         | 100%          |
| N-Acetyl-S-(2-carboxyethyl)-L-cysteine (CEMA) (Acrolein)                                      | 113                                    | 120.6*   | 103.4        | 140.5        | 100%          | 85                     | 95.78    | 81.39        | 112.8        | 100%          |
| N-Acetyl-S-(1-cyano-2-hydroxyethyl)-L-cysteine (CYHA) (Acrylonitrile)*                        | 123                                    | 2.630*   | 2.184        | 3.167        | 16%           | 93                     | 2.226    | 1.768        | 2.802        | 12%           |
| N-Acetyl-S-(2-cyanoethyl)-L-cysteine (CYMA) (Acrylonitrile)                                   | 123                                    | 4.804*   | 3.559        | 6.484        | 95%           | 93                     | 3.194#   | 2.018        | 5.052        | 94%           |
| N-Acetyl-S-(3,4-dihydroxybutyl)-L-cysteine (DHBM) (1,3-Butadiene)                             | 106                                    | 384.2*   | 365.1        | 404.1        | 100%          | 83                     | 337      | 305.4        | 371.8        | 100%          |
| N-Acetyl-S-(2-carbamoyl-2-hydroxyethyl)-L-cysteine (GAMA) (Acrylamide)                        | 115                                    | 10.70*   | 9.4          | 12.18        | 46%           | 88                     | 9.153    | 8.062        | 10.39        | 45%           |
| N-Acetyl-S-(2-hydroxyethyl)-L-cysteine (HEMA) (Acrylonitrile, vinyl chloride, ethylene oxide) | 109                                    | 1.086*   | 0.925        | 1.274        | 47%           | 74                     | 1.063    | 0.862        | 1.31         | 58%           |
| N-Acetyl-S-(2-hydroxypropyl)-L-cysteine (HPM2) (Propylene Oxide)                              | 122                                    | 38.96*   | 33.27        | 45.62        | 96%           | 92                     | 30.05    | 25.17        | 35.9         | 100%          |

|                                                                           |     |        |       |       |      |    |       |       |       |      |
|---------------------------------------------------------------------------|-----|--------|-------|-------|------|----|-------|-------|-------|------|
| N-Acetyl-S-(3-hydroxypropyl)-L-cysteine (HPMA) (Acrolein)                 | 121 | 365.4* | 312.9 | 426.7 | 100% | 91 | 267.2 | 218.2 | 327.1 | 100% |
| N-Acetyl-S-(3-hydroxypropyl-1-methyl)-L-cysteine (HPMM) (Crotonaldehyde)  | 123 | 441.3* | 359.7 | 541.4 | 99%  | 93 | 444.4 | 387.5 | 509.7 | 100% |
| N-Acetyl-S-(4-hydroxy-2-methyl-2-buten-1-yl)-L-cysteine (IPM3) (Isoprene) | 123 | 3.790* | 3.225 | 4.452 | 88%  | 92 | 3.698 | 2.88  | 4.749 | 95%  |
| Mandelic acid (MADA)                                                      | 112 | 153.4* | 121.2 | 194.2 | 97%  | 86 | 124.3 | 107   | 144.4 | 97%  |
| N-Acetyl-S-(4-hydroxy-2-buten-1-yl)-L-cysteine (MHB3) (1,3-Butadiene)     | 123 | 4.344* | 3.854 | 4.897 | 97%  | 93 | 4.27  | 3.6   | 5.064 | 99%  |
| Phenylglyoxylic acid (PGHA) (Ethylbenzene, styrene)                       | 113 | 237.0* | 190.6 | 294.8 | 100% | 90 | 210.8 | 184.1 | 241.1 | 100% |
| N-Acetyl-S-(phenyl)-L-cysteine (PMA) (Benzene)                            | 123 | 1.067  | 0.938 | 1.214 | 68%  | 93 | 0.944 | 0.773 | 1.153 | 69%  |
| 2-Thioxothiazolidine-4-carboxylic acid (TTCA) (Carbon Disulfide)          | 107 | 19.51  | 15.24 | 24.98 | 67%  | 79 | 19.18 | 13.88 | 26.51 | 70%  |

**eTable 3 – cont’:** Biomarkers of exposure to tobacco-related compounds and other chemicals, among everyday and someday users of e-cigarettes and cigarettes (normalized for creatinine, geometric means, 95% confidence intervals), PATH Wave 1 (2013-2014) (n=2,658)

| Biomarker                                                                            | Current Cigarette-only Smokers (n=2,411) |          |              |              |               |                        |          |              |              |               |
|--------------------------------------------------------------------------------------|------------------------------------------|----------|--------------|--------------|---------------|------------------------|----------|--------------|--------------|---------------|
|                                                                                      | Everyday users (n=1,975)                 |          |              |              |               | Somedays users (n=436) |          |              |              |               |
|                                                                                      | N                                        | Geo Mean | 95% CI Lower | 95% CI Upper | % N Above LOD | N                      | Geo Mean | 95% CI Lower | 95% CI Upper | % N Above LOD |
| <b>Polycyclic Aromatic Hydrocarbons (ng/mg creatinine)</b>                           |                                          |          |              |              |               |                        |          |              |              |               |
| 1-Naphthol or 1-hydroxynaphthalene (1-NAP)                                           | 1975                                     | 14.48#   | 13.32        | 15.74        | 100%          | 436                    | 2.782*#  | 2.402        | 3.221        | 100%          |
| 2-Naphthol or 2-hydroxynaphthalene (2-NAP)                                           | 1975                                     | 15.93#   | 15.29        | 16.61        | 100%          | 436                    | 6.849*#  | 6.265        | 7.486        | 100%          |
| 3-Hydroxyfluorene (3-FLU)                                                            | 1975                                     | 0.713#   | 0.679        | 0.749        | 100%          | 436                    | 0.174*#  | 0.154        | 0.197        | 100%          |
| 2-Hydroxyfluorene (2-FLU)                                                            | 1975                                     | 1.234#   | 1.176        | 1.295        | 100%          | 436                    | 0.348*#  | 0.318        | 0.381        | 100%          |
| 1-Hydroxyphenanthrene (1-PHE)                                                        | 1975                                     | 0.193#   | 0.185        | 0.202        | 100%          | 436                    | 0.117*   | 0.103        | 0.132        | 99%           |
| 1-Hydroxypyrene (1-PYR)                                                              | 1975                                     | 0.336#   | 0.318        | 0.354        | 98%           | 436                    | 0.178*   | 0.161        | 0.197        | 93%           |
| 2-Hydroxyphenanthrene and 3-Hydroxyphenanthrene (2-3PHE)                             | 1975                                     | 0.339#   | 0.323        | 0.357        | 100%          | 436                    | 0.169*#  | 0.156        | 0.184        | 100%          |
| <b>Volatile Organic Compounds (VOC)<sup>§</sup> (ng/mg creatinine)</b>               |                                          |          |              |              |               |                        |          |              |              |               |
| 2-Methylhippuric acid (2MHA) (Xylene)                                                | 1861                                     | 117.7#   | 110.6        | 125.2        | 100%          | 413                    | 40.04*#  | 34.61        | 46.32        | 96%           |
| 3, 4-Methylhippuric acid (34MH) (Xylene)                                             | 1899                                     | 811.2#   | 765.3        | 859.8        | 100%          | 421                    | 272.6*#  | 241.1        | 308.2        | 100%          |
| N-Acetyl-S-(2-carbamoyl-ethyl)-L-cysteine (AAMA) (Acrylamide)                        | 1885                                     | 153.3#   | 146.7        | 160.1        | 100%          | 418                    | 74.64*#  | 66.07        | 84.33        | 100%          |
| N-Acetyl-S-(N-methylcarbamoyl)-L-cysteine (AMCA) (N,N-Dimethylformamide/isocyanates) | 1873                                     | 572.4#   | 543          | 603.5        | 100%          | 417                    | 203.6*#  | 186.4        | 222.3        | 100%          |
| N-Acetyl-S-(benzyl)-L-cysteine (BMA) (Toluene)                                       | 1891                                     | 6.701    | 6.196        | 7.246        | 100%          | 418                    | 6.674    | 5.596        | 7.96         | 100%          |
| N-Acetyl-S-(2-carboxyethyl)-L-cysteine (CEMA) (Acrolein)                             | 1782                                     | 310.7#   | 292.4        | 330.2        | 100%          | 394                    | 137.8*#  | 125.5        | 151.2        | 100%          |
| N-Acetyl-S-(1-cyano-2-hydroxyethyl)-L-cysteine (CYHA) (Acrylonitrile)*               | 1900                                     | 28.93#   | 26.99        | 31           | 96%           | 421                    | 5.151*#  | 4.443        | 5.971        | 50%           |
| N-Acetyl-S-(2-cyanoethyl)-L-cysteine (CYMA) (Acrylonitrile)                          | 1900                                     | 179.3#   | 167          | 192.5        | 100%          | 421                    | 18.81*#  | 14.33        | 24.68        | 97%           |
| N-Acetyl-S-(3,4-dihydroxybutyl)-L-cysteine (DHBM) (1,3-Butadiene)                    | 1683                                     | 528.5#   | 510.2        | 547.4        | 100%          | 383                    | 379.5*#  | 353.6        | 407.2        | 100%          |
| N-Acetyl-S-(2-carbamoyl-2-hydroxyethyl)-L-cysteine (GAMA) (Acrylamide)               | 1781                                     | 18.96#   | 18.2         | 19.75        | 75%           | 393                    | 10.92*   | 9.72         | 12.28        | 51%           |



|                                                                                               |      |         |        |        |      |     |         |       |       |      |
|-----------------------------------------------------------------------------------------------|------|---------|--------|--------|------|-----|---------|-------|-------|------|
| N-Acetyl-S-(2-hydroxyethyl)-L-cysteine (HEMA) (Acrylonitrile, vinyl chloride, ethylene oxide) | 1629 | 3.172#  | 2.946  | 3.415  | 88%  | 359 | 1.317*# | 1.129 | 1.537 | 62%  |
| N-Acetyl-S-(2-hydroxypropyl)-L-cysteine (HPM2) (Propylene Oxide)                              | 1884 | 79.74#  | 75.78  | 83.9   | 99%  | 417 | 39.64*  | 36.12 | 43.5  | 99%  |
| N-Acetyl-S-(3-hydroxypropyl)-L-cysteine (HPMA) (Acrolein)                                     | 1873 | 1375.9# | 1286.6 | 1471.2 | 100% | 411 | 441.1*# | 401.4 | 484.6 | 100% |
| N-Acetyl-S-(3-hydroxypropyl-1-methyl)-L-cysteine (HPMM) (Crotonaldehyde)                      | 1900 | 2937.5# | 2746.3 | 3141.9 | 100% | 421 | 771.9*# | 697.4 | 854.4 | 100% |
| N-Acetyl-S-(4-hydroxy-2-methyl-2-buten-1-yl)-L-cysteine (IPM3) (Isoprene)                     | 1898 | 44.60#  | 41.47  | 47.97  | 100% | 418 | 7.727*# | 6.287 | 9.497 | 93%  |
| Mandelic acid (MADA)                                                                          | 1730 | 305.9#  | 294.4  | 318    | 100% | 382 | 175.6*# | 162.1 | 190.1 | 99%  |
| N-Acetyl-S-(4-hydroxy-2-buten-1-yl)-L-cysteine (MHB3) (1,3-Butadiene)                         | 1900 | 34.36#  | 32.38  | 36.47  | 100% | 421 | 9.649*# | 8.222 | 11.32 | 100% |
| Phenylglyoxylic acid (PGHA) (Ethylbenzene, styrene)                                           | 1792 | 407.3#  | 390.7  | 424.5  | 100% | 400 | 249.9*  | 227.1 | 275   | 100% |
| N-Acetyl-S-(phenyl)-L-cysteine (PMA) (Benzene)                                                | 1900 | 1.111   | 1.054  | 1.175  | 68%  | 421 | 0.986   | 0.88  | 1.104 | 70%  |
| 2-Thioxothiazolidine-4-carboxylic acid (TTCA) (Carbon Disulfide)                              | 1649 | 22.26   | 20.75  | 23.87  | 74%  | 365 | 20.26   | 17.31 | 23.71 | 72%  |

### **Footnotes:**

N reflects total number of cases included in estimate (excluding participants with results outside of quality control standards.) \*Indicates analyte with >40% of all values falling below Limit of Detection (LOD) for select group. % LOD reflects proportion among cases included in estimate.

^ Detection rates for these metabolites only apply to participants who had urinary cotinine levels greater than 20 ng/L, which is reflected in the sample size for each biomarker

Weighted estimates, geometric mean calculated by  $\exp(\text{mean of log transformed [biomarker value/creatinine value]})$ . Some VOC laboratory results were outstanding at the time these analyses were conducted, so weighted estimates may not accurately reflect values in the target population.

Total Nicotine Equivalents (TNE2) calculated by taking molar sum of trans-3'-hydroxycotinine and cotinine divided by urinary creatinine. Geometric means expressed to four significant figures if under 1000; geometric means over 1000 expressed to five significant figures.

Red text denotes values with RSE>30% or denominator <50

\$ VOC information presented as Biomarker Name (Lab Code) (Parent Compound)

\* Denotes statistically significant difference when compared to daily cigarette-only smokers based on results from linear regression models adjusted for urinary creatinine, age, sex, ethnicity, education, SHS exposure, past 30 day marijuana use ( $p<0.05$ ).

# Denotes statistically significant difference when compared to daily e-cigarette users based on results from linear regression models adjusted for urinary creatinine, age, sex, ethnicity, education, SHS exposure, past 30 day marijuana use, ( $p<0.05$ ).

**eTable 4.** Biomarkers of Exposure to Tobacco-Related Compounds and Other Chemicals, Among Dual Users (normalized for creatinine, geometric means, 95% confidence intervals), PATH Wave 1 (2013-2014) (n=792)

| Biomarker                                                       | Everyday smokers/everyday e-cigarette users (n=90) (a) |                      |              |              |               | Everyday e-cigarette users/somedays smoker (n=55) (b) |                     |              |              |               |
|-----------------------------------------------------------------|--------------------------------------------------------|----------------------|--------------|--------------|---------------|-------------------------------------------------------|---------------------|--------------|--------------|---------------|
|                                                                 | N                                                      | Geo Mean             | 95% CI Lower | 95% CI Upper | % N Above LOD | N                                                     | Geo Mean            | 95% CI Lower | 95% CI Upper | % N Above LOD |
| <b>Urinary Nicotine Metabolites (ng/mg creatinine)</b>          |                                                        |                      |              |              |               |                                                       |                     |              |              |               |
| Nicotine Equivalence (TNE2) (nmol/mg)                           | 90                                                     | 66.40 <sup>d</sup>   | 54           | 81.6         | 100%          | 55                                                    | 35.10 <sup>d</sup>  | 19.9         | 62           | 100%          |
| <i>trans</i> -3'-Hydroxycotinine (HCTT)                         | 90                                                     | 7696.1 <sup>bd</sup> | 6343.2       | 9337.4       | 100%          | 55                                                    | 3748.8 <sup>a</sup> | 2049.8       | 6855.9       | 100%          |
| Cotinine (COTT)                                                 | 90                                                     | 4109.9 <sup>d</sup>  | 3126         | 5403.6       | 100%          | 55                                                    | 2443.9 <sup>d</sup> | 1420.1       | 4205.8       | 100%          |
| Nicotine (NICT) <sup>^</sup>                                    | 90                                                     | 1781.9 <sup>d</sup>  | 1101.7       | 2881.9       | 100%          | 54                                                    | 1210.9 <sup>d</sup> | 766.6        | 1912.9       | 100%          |
| Cotinine N-oxide (COXT) <sup>^</sup>                            | 90                                                     | 439.0 <sup>d</sup>   | 377.7        | 510.4        | 100%          | 54                                                    | 313.5 <sup>d</sup>  | 214.2        | 459.3        | 100%          |
| Nicotine 1'-oxide (NOXT) <sup>^</sup>                           | 90                                                     | 557.3 <sup>d</sup>   | 416.8        | 745.1        | 100%          | 54                                                    | 449.2 <sup>d</sup>  | 294.6        | 685.4        | 100%          |
| Norcotinine (NCCT) <sup>^</sup>                                 | 90                                                     | 138.8 <sup>d</sup>   | 110.3        | 174.6        | 100%          | 54                                                    | 80.91 <sup>d</sup>  | 54           | 121.2        | 100%          |
| Nornicotine (NNCT) <sup>^</sup>                                 | 90                                                     | 87.61 <sup>d</sup>   | 63.43        | 120.9        | 100%          | 54                                                    | 50.95 <sup>d</sup>  | 33.53        | 77.42        | 97%           |
| <b>Minor Tobacco Alkaloids (ng/mg creatinine)</b>               |                                                        |                      |              |              |               |                                                       |                     |              |              |               |
| Anabasine (ANBT) <sup>^</sup>                                   | 89                                                     | 9.450 <sup>d</sup>   | 6.299        | 14.17        | 98%           | 54                                                    | 3.727 <sup>c</sup>  | 1.848        | 7.527        | 83%           |
| Anatabine (ANTT) <sup>^</sup>                                   | 90                                                     | 17.09 <sup>bd</sup>  | 10.84        | 26.94        | 98%           | 54                                                    | 4.845 <sup>ac</sup> | 2.148        | 10.93        | 82%           |
| <b>Arsenic and Arsenic Compounds (ug/g creatinine)</b>          |                                                        |                      |              |              |               |                                                       |                     |              |              |               |
| Total Inorganic Arsenic                                         | 90                                                     | 0.055                | 0.046        | 0.066        | 81%           | 55                                                    | 0.048               | 0.04         | 0.059        | 95%           |
| <b>Tobacco Specific Nitrosamines (TSNAs) (pg/mg creatinine)</b> |                                                        |                      |              |              |               |                                                       |                     |              |              |               |
| 4-methylnitrosamino)-4-(3-pyridyl)-1-butanol (NNAL)             | 90                                                     | 354.9 <sup>bd</sup>  | 266.9        | 472          | 100%          | 55                                                    | 87.02 <sup>ac</sup> | 51.59        | 146.78       | 100%          |

|                                        |    |                     |       |       |      |    |                     |       |       |      |
|----------------------------------------|----|---------------------|-------|-------|------|----|---------------------|-------|-------|------|
| N'-nitrosoanatabine (NAT)              | 89 | 163.0 <sup>bd</sup> | 105.8 | 251.3 | 98%  | 54 | 38.02 <sup>ac</sup> | 18.54 | 77.95 | 72%  |
| N'-nitrosoanabasine (NAB)              | 90 | 25.14 <sup>bd</sup> | 16.37 | 38.59 | 95%  | 54 | 7.798 <sup>ac</sup> | 4.297 | 14.15 | 70%  |
| N'-Nitrosoanornicotine (NNN)           | 85 | 14.90 <sup>bd</sup> | 9.33  | 23.78 | 88%  | 54 | 6.768 <sup>ac</sup> | 4.802 | 9.54  | 78%  |
| <b>Heavy Metals (ng/mg creatinine)</b> |    |                     |       |       |      |    |                     |       |       |      |
| Beryllium (UBE)*                       | 90 | 0.015 <sup>c</sup>  | 0.011 | 0.019 | 2%   | 54 | 0.012               | 0.009 | 0.015 | 8%   |
| Cadmium (UCD)                          | 90 | 0.321 <sup>d</sup>  | 0.259 | 0.398 | 96%  | 54 | 0.264               | 0.14  | 0.496 | 98%  |
| Cobalt (UCO)                           | 90 | 0.604               | 0.532 | 0.685 | 100% | 54 | 0.691               | 0.467 | 1.021 | 100% |
| Manganese (UMN)*                       | 90 | 0.164               | 0.132 | 0.204 | 32%  | 54 | 0.127               | 0.104 | 0.156 | 42%  |
| Lead (UPB)                             | 90 | 0.56                | 0.463 | 0.677 | 100% | 54 | 0.473               | 0.403 | 0.555 | 100% |
| Strontium (USR)                        | 90 | 139.9               | 119.5 | 163.9 | 100% | 54 | 112.7               | 82.21 | 154.5 | 100% |
| Thallium (UTL)                         | 90 | 0.153               | 0.137 | 0.171 | 100% | 54 | 0.169               | 0.153 | 0.187 | 100% |
| Uranium (UUR)                          | 90 | 0.008               | 0.006 | 0.011 | 85%  | 54 | 0.008               | 0.006 | 0.012 | 96%  |

**eTable 4 – cont’:** Biomarkers of exposure to tobacco-related compounds and other chemicals, among dual users (normalized for creatinine, geometric means, 95% confidence intervals), PATH Wave 1 (2013-2014) (n=792)

| Biomarker                                                       | Everyday smokers/somedays e-cigarette users (n=560) (c) |                     |              |              |               | Somedays smokers/somedays e-cigarette users (n=87) (d) |                      |              |              |               |
|-----------------------------------------------------------------|---------------------------------------------------------|---------------------|--------------|--------------|---------------|--------------------------------------------------------|----------------------|--------------|--------------|---------------|
|                                                                 | N                                                       | Geo Mean            | 95% CI Lower | 95% CI Upper | % N Above LOD | N                                                      | Geo Mean             | 95% CI Lower | 95% CI Upper | % N Above LOD |
| <b>Urinary Nicotine Metabolites (ng/mg creatinine)</b>          |                                                         |                     |              |              |               |                                                        |                      |              |              |               |
| Nicotine Equivalence (TNE2) (nmol/mg)                           | 560                                                     | 53.60 <sup>d</sup>  | 49.5         | 58           | 100%          | 87                                                     | 7.225 <sup>abc</sup> | 3.868        | 13.5         | 100%          |
| <i>trans</i> -3'-Hydroxycotinine (HCTT)                         | 560                                                     | 5989.4 <sup>d</sup> | 5483.1       | 6542.6       | 100%          | 86                                                     | 948.4 <sup>ac</sup>  | 519.7        | 1730.8       | 100%          |
| Cotinine (COTT)                                                 | 560                                                     | 3530.6 <sup>d</sup> | 3261.2       | 3822.1       | 100%          | 87                                                     | 457.5 <sup>abc</sup> | 252.5        | 828.8        | 100%          |
| Nicotine (NICT)^                                                | 558                                                     | 1605.2 <sup>d</sup> | 1433.8       | 1797.2       | 99%           | 77                                                     | 200.0 <sup>abc</sup> | 119.2        | 335.6        | 86%           |
| Cotinine N-oxide (COXT)^                                        | 558                                                     | 395.7 <sup>d</sup>  | 368.9        | 424.3        | 100%          | 77                                                     | 105.8 <sup>abc</sup> | 78.7         | 142.3        | 100%          |
| Nicotine 1'-oxide (NOXT)^                                       | 558                                                     | 449.0 <sup>d</sup>  | 408.5        | 493.5        | 100%          | 77                                                     | 65.40 <sup>abc</sup> | 42.25        | 101.2        | 91%           |
| Norcotinine (NCCT)^                                             | 558                                                     | 114.1 <sup>d</sup>  | 106.5        | 122.3        | 100%          | 77                                                     | 27.63 <sup>abc</sup> | 20.07        | 38.03        | 96%           |
| Nornicotinine (NNCT)^                                           | 558                                                     | 80.46 <sup>d</sup>  | 73.64        | 87.91        | 99%           | 77                                                     | 16.05 <sup>abc</sup> | 11.71        | 22           | 82%           |
| <b>Minor Tobacco Alkaloids (ng/mg creatinine)</b>               |                                                         |                     |              |              |               |                                                        |                      |              |              |               |
| Anabasine (ANBT)^                                               | 558                                                     | 10.44 <sup>bd</sup> | 9.53         | 11.44        | 99%           | 77                                                     | 2.021 <sup>ac</sup>  | 1.486        | 2.747        | 79%           |
| Anatabine (ANTT)^                                               | 558                                                     | 18.43 <sup>bd</sup> | 16.7         | 20.35        | 99%           | 77                                                     | 2.677 <sup>ac</sup>  | 1.82         | 3.938        | 80%           |
| <b>Arsenic and Arsenic Compounds (ug/g creatinine)</b>          |                                                         |                     |              |              |               |                                                        |                      |              |              |               |
| Total Inorganic Arsenic                                         | 559                                                     | 0.046               | 0.044        | 0.049        | 75%           | 86                                                     | 0.046                | 0.041        | 0.052        | 86%           |
| <b>Tobacco Specific Nitrosamines (TSNAs) (pg/mg creatinine)</b> |                                                         |                     |              |              |               |                                                        |                      |              |              |               |

|                                                     |     |                     |       |       |      |    |                     |       |       |      |
|-----------------------------------------------------|-----|---------------------|-------|-------|------|----|---------------------|-------|-------|------|
| 4-methylnitrosamino)-4-(3-pyridyl)-1-butanol (NNAL) | 558 | 343.7 <sup>bd</sup> | 315.7 | 374.3 | 100% | 86 | 59.96 <sup>ac</sup> | 40.68 | 88.39 | 98%  |
| N'-nitrosoanatabine (NAT)                           | 547 | 173.3 <sup>bd</sup> | 155.5 | 193.1 | 99%  | 86 | 25.66 <sup>ac</sup> | 16.92 | 38.92 | 67%  |
| N'-nitrosoanabasine (NAB)                           | 558 | 26.91 <sup>bd</sup> | 24.28 | 29.83 | 97%  | 86 | 5.544 <sup>ac</sup> | 3.947 | 7.787 | 66%  |
| N'-Nitrososornicotine (NNN)                         | 548 | 13.90 <sup>bd</sup> | 12.54 | 15.42 | 93%  | 86 | 4.182 <sup>ac</sup> | 3.217 | 5.438 | 54%  |
| <b>Heavy Metals (ng/mg creatinine)</b>              |     |                     |       |       |      |    |                     |       |       |      |
| Beryllium (UBE)*                                    | 559 | 0.013 <sup>a</sup>  | 0.012 | 0.014 | 8%   | 87 | 0.012               | 0.01  | 0.014 | 5%   |
| Cadmium (UCD)                                       | 559 | 0.297 <sup>d</sup>  | 0.27  | 0.327 | 97%  | 87 | 0.159 <sup>ac</sup> | 0.127 | 0.2   | 90%  |
| Cobalt (UCO)                                        | 559 | 0.597               | 0.554 | 0.643 | 100% | 87 | 0.561               | 0.507 | 0.62  | 100% |
| Manganese (UMN)*                                    | 559 | 0.158               | 0.145 | 0.173 | 43%  | 87 | 0.129               | 0.111 | 0.151 | 36%  |
| Lead (UPB)                                          | 559 | 0.502               | 0.472 | 0.535 | 100% | 87 | 0.436               | 0.369 | 0.515 | 99%  |
| Strontium (USR)                                     | 556 | 130.6               | 119.4 | 142.8 | 100% | 87 | 132.5               | 118.2 | 148.5 | 100% |
| Thallium (UTL)                                      | 559 | 0.162               | 0.154 | 0.171 | 99%  | 87 | 0.178               | 0.157 | 0.202 | 99%  |
| Uranium (UUR)                                       | 559 | 0.008               | 0.007 | 0.009 | 90%  | 87 | 0.007               | 0.006 | 0.009 | 88%  |

**eTable 4 – cont’:** Biomarkers of exposure to tobacco-related compounds and other chemicals, among dual users (normalized for creatinine, geometric means, 95% confidence intervals), PATH Wave 1 (2013-2014) (n=792)

| Biomarker                                                                            | Everyday smokers/everyday e-cigarette users (n=90) (a) |                      |              |              |               | Everyday e-cigarette users/somedays smoker (n=55) (b) |                     |              |              |               |
|--------------------------------------------------------------------------------------|--------------------------------------------------------|----------------------|--------------|--------------|---------------|-------------------------------------------------------|---------------------|--------------|--------------|---------------|
|                                                                                      | N                                                      | Geo Mean             | 95% CI Lower | 95% CI Upper | % N Above LOD | N                                                     | Geo Mean            | 95% CI Lower | 95% CI Upper | % N Above LOD |
| <b>Polycyclic Aromatic Hydrocarbons (ng/mg creatinine)</b>                           |                                                        |                      |              |              |               |                                                       |                     |              |              |               |
| 1-Naphthol or 1-hydroxynaphthalene (1-NAP)                                           | 90                                                     | 15.51 <sup>d</sup>   | 12.10        | 19.89        | 100%          | 55                                                    | 6.703 <sup>c</sup>  | 3.54         | 12.69        | 100%          |
| 2-Naphthol or 2-hydroxynaphthalene (2-NAP)                                           | 90                                                     | 16.03 <sup>d</sup>   | 13.67        | 18.79        | 100%          | 55                                                    | 10.85 <sup>c</sup>  | 7.197        | 16.34        | 100%          |
| 3-Hydroxyfluorene (3-FLU)                                                            | 90                                                     | 0.757 <sup>bd</sup>  | 0.617        | 0.929        | 100%          | 55                                                    | 0.319 <sup>ac</sup> | 0.207        | 0.493        | 100%          |
| 2-Hydroxyfluorene (2-FLU)                                                            | 90                                                     | 1.347 <sup>bd</sup>  | 1.131        | 1.608        | 100%          | 55                                                    | 0.626 <sup>ac</sup> | 0.425        | 0.921        | 100%          |
| 1-Hydroxyphenanthrene (1-PHE)                                                        | 90                                                     | 0.214 <sup>bd</sup>  | 0.189        | 0.243        | 100%          | 55                                                    | 0.147 <sup>ac</sup> | 0.118        | 0.183        | 100%          |
| 1-Hydroxypyrene (1-PYR)                                                              | 90                                                     | 0.368 <sup>bcd</sup> | 0.313        | 0.434        | 98%           | 55                                                    | 0.217 <sup>ac</sup> | 0.173        | 0.271        | 100%          |
| 2-Hydroxyphenanthrene and 3-Hydroxyphenanthrene (2-3PHE)                             | 90                                                     | 0.353 <sup>bd</sup>  | 0.296        | 0.422        | 100%          | 55                                                    | 0.237 <sup>ac</sup> | 0.185        | 0.304        | 100%          |
| <b>Volatile Organic Compounds (VOC)<sup>s</sup> (ng/mg creatinine)</b>               |                                                        |                      |              |              |               |                                                       |                     |              |              |               |
| 2-Methylhippuric acid (2MHA) (Xylene)                                                | 84                                                     | 135.7 <sup>bd</sup>  | 111.8        | 164.7        | 100%          | 48                                                    | 56.53 <sup>ac</sup> | 43.68        | 73.16        | 100%          |
| 3, 4-Methylhippuric acid (34MH) (Xylene)                                             | 85                                                     | 833.3 <sup>bd</sup>  | 705.8        | 983.9        | 100%          | 50                                                    | 388.4 <sup>ac</sup> | 306.6        | 491.9        | 100%          |
| N-Acetyl-S-(2-carbamoyl ethyl)-L-cysteine (AAMA) (Acrylamide)                        | 83                                                     | 166.7 <sup>bd</sup>  | 144.9        | 191.6        | 100%          | 49                                                    | 85.21 <sup>ac</sup> | 72.74        | 99.81        | 100%          |
| N-Acetyl-S-(N-methylcarbamoyl)-L-cysteine (AMCA) (N,N-Dimethylformamide/isocyanates) | 84                                                     | 578.6 <sup>bd</sup>  | 493.9        | 677.7        | 100%          | 50                                                    | 259.8 <sup>ac</sup> | 213.1        | 316.8        | 100%          |
| N-Acetyl-S-(benzyl)-L-cysteine (BMA) (Toluene)                                       | 85                                                     | 7.145                | 5.823        | 8.766        | 100%          | 50                                                    | 6.910               | 5.004        | 9.541        | 100%          |

|                                                                                               |    |                       |        |        |      |    |                      |       |        |      |
|-----------------------------------------------------------------------------------------------|----|-----------------------|--------|--------|------|----|----------------------|-------|--------|------|
| N-Acetyl-S-(2-carboxyethyl)-L-cysteine (CEMA) (Acrolein)                                      | 80 | 316.9 <sup>bd</sup>   | 267.6  | 375.4  | 100% | 48 | 182.0 <sup>ac</sup>  | 149.7 | 221.2  | 100% |
| N-Acetyl-S-(1-cyano-2-hydroxyethyl)-L-cysteine (CYHA) (Acrylonitrile)                         | 85 | 26.38 <sup>bcd</sup>  | 21.37  | 32.55  | 94%  | 50 | 9.114 <sup>ac</sup>  | 6.224 | 13.35  | 70%  |
| N-Acetyl-S-(2-cyanoethyl)-L-cysteine (CYMA) (Acrylonitrile)                                   | 85 | 180.5 <sup>bd</sup>   | 147.1  | 221.6  | 100% | 50 | 39.39 <sup>ac</sup>  | 24.55 | 63.19  | 100% |
| N-Acetyl-S-(3,4-dihydroxybutyl)-L-cysteine (DHBM) (1,3-Butadiene)                             | 76 | 527.2                 | 475.3  | 584.7  | 100% | 47 | 413.0 <sup>c</sup>   | 366.3 | 465.8  | 100% |
| N-Acetyl-S-(2-carbamoyl-2-hydroxyethyl)-L-cysteine (GAMA) (Acrylamide)                        | 83 | 19.73 <sup>bd</sup>   | 17.32  | 22.46  | 71%  | 44 | 12.19 <sup>ac</sup>  | 10.37 | 14.33  | 77%  |
| N-Acetyl-S-(2-hydroxyethyl)-L-cysteine (HEMA) (Acrylonitrile, vinyl chloride, ethylene oxide) | 78 | 3.397 <sup>bd</sup>   | 2.768  | 4.17   | 89%  | 41 | 1.521 <sup>ac</sup>  | 1.057 | 2.185  | 78%  |
| N-Acetyl-S-(2-hydroxypropyl)-L-cysteine (HPM2) (Propylene Oxide)                              | 85 | 89.24                 | 70.88  | 112.4  | 100% | 50 | 59.06 <sup>c</sup>   | 46.53 | 74.97  | 100% |
| N-Acetyl-S-(3-hydroxypropyl)-L-cysteine (HPMA) (Acrolein)                                     | 85 | 1487.9 <sup>bd</sup>  | 1246   | 1776.8 | 100% | 50 | 618.1 <sup>ac</sup>  | 519.5 | 735.5  | 100% |
| N-Acetyl-S-(3-hydroxypropyl-1-methyl)-L-cysteine (HPMM) (Crotonaldehyde)                      | 84 | 2947.1 <sup>bcd</sup> | 2495.2 | 3480.9 | 100% | 50 | 1091.9 <sup>ac</sup> | 892.3 | 1336.2 | 100% |
| N-Acetyl-S-(4-hydroxy-2-methyl-2-buten-1-yl)-L-cysteine (IPM3) (Isoprene)                     | 85 | 44.58 <sup>bd</sup>   | 35.48  | 56.02  | 100% | 50 | 12.83 <sup>ac</sup>  | 9.278 | 17.75  | 97%  |
| Mandelic acid (MADA)                                                                          | 76 | 289.7 <sup>bd</sup>   | 249.5  | 336.4  | 99%  | 47 | 176.5 <sup>ac</sup>  | 147.1 | 211.6  | 99%  |
| N-Acetyl-S-(4-hydroxy-2-buten-1-yl)-L-cysteine (MHB3) (1,3-Butadiene)                         | 85 | 32.71 <sup>bcd</sup>  | 27.44  | 38.99  | 100% | 50 | 13.45 <sup>ac</sup>  | 10.48 | 17.26  | 100% |
| Phenylglyoxylic acid (PGHA) (Ethylbenzene, styrene)                                           | 81 | 404.6 <sup>bcd</sup>  | 360.3  | 454.3  | 100% | 50 | 289.6 <sup>ac</sup>  | 256.7 | 326.6  | 100% |
| N-Acetyl-S-(phenyl)-L-cysteine (PMA) (Benzene)                                                | 85 | 1.147                 | 0.985  | 1.336  | 60%  | 50 | 0.886                | 0.72  | 1.092  | 67%  |
| 2-Thioxothiazolidine-4-carboxylic acid (TTCA) (Carbon Disulfide)                              | 76 | 25.76                 | 20.36  | 32.61  | 72%  | 44 | 20.02                | 14.2  | 28.23  | 73%  |

**eTable 4 – cont’:** Biomarkers of exposure to tobacco-related compounds and other chemicals, among dual users (normalized for creatinine, geometric means, 95% confidence intervals), PATH Wave 1 (2013-2014) (n=792)

| Biomarker                                                              | Everyday smokers/somedays e-cigarette users (n=560) (c) |                      |              |              |               | Somedays smokers/somedays e-cigarette users (n=87) (d) |                     |              |              |               |
|------------------------------------------------------------------------|---------------------------------------------------------|----------------------|--------------|--------------|---------------|--------------------------------------------------------|---------------------|--------------|--------------|---------------|
|                                                                        | N                                                       | Geo Mean             | 95% CI Lower | 95% CI Upper | % N Above LOD | N                                                      | Geo Mean            | 95% CI Lower | 95% CI Upper | % N Above LOD |
| <b>Polycyclic Aromatic Hydrocarbons (ng/mg creatinine)</b>             |                                                         |                      |              |              |               |                                                        |                     |              |              |               |
| 1-Naphthol or 1-hydroxynaphthalene (1-NAP)                             | 559                                                     | 16.47 <sup>bd</sup>  | 14.5         | 18.71        | 100%          | 87                                                     | 4.618 <sup>ac</sup> | 2.96         | 7.204        | 100%          |
| 2-Naphthol or 2-hydroxynaphthalene (2-NAP)                             | 559                                                     | 16.35 <sup>bd</sup>  | 15.5         | 17.24        | 100%          | 87                                                     | 8.299 <sup>ac</sup> | 6.917        | 9.958        | 100%          |
| 3-Hydroxyfluorene (3-FLU)                                              | 560                                                     | 0.752 <sup>bd</sup>  | 0.701        | 0.807        | 100%          | 87                                                     | 0.237 <sup>ac</sup> | 0.184        | 0.306        | 99%           |
| 2-Hydroxyfluorene (2-FLU)                                              | 560                                                     | 1.326 <sup>bd</sup>  | 1.242        | 1.416        | 100%          | 87                                                     | 0.500 <sup>ac</sup> | 0.401        | 0.622        | 100%          |
| 1-Hydroxyphenanthrene (1-PHE)                                          | 560                                                     | 0.215 <sup>bd</sup>  | 0.203        | 0.227        | 100%          | 87                                                     | 0.142 <sup>ac</sup> | 0.121        | 0.166        | 100%          |
| 1-Hydroxypyrene (1-PYR)                                                | 560                                                     | 0.395 <sup>abd</sup> | 0.374        | 0.418        | 99%           | 87                                                     | 0.228 <sup>ac</sup> | 0.193        | 0.269        | 96%           |
| 2-Hydroxyphenanthrene and 3-Hydroxyphenanthrene (2-3PHE)               | 560                                                     | 0.345 <sup>bd</sup>  | 0.324        | 0.368        | 100%          | 87                                                     | 0.182 <sup>ac</sup> | 0.157        | 0.21         | 100%          |
| <b>Volatile Organic Compounds (VOC)<sup>s</sup> (ng/mg creatinine)</b> |                                                         |                      |              |              |               |                                                        |                     |              |              |               |
| 2-Methylhippuric acid (2MHA) (Xylene)                                  | 521                                                     | 125.8 <sup>bd</sup>  | 115.4        | 137.1        | 99%           | 83                                                     | 47.87 <sup>ac</sup> | 37.58        | 60.97        | 99%           |
| 3, 4-Methylhippuric acid (34MH) (Xylene)                               | 548                                                     | 894.9 <sup>bd</sup>  | 831.4        | 963.2        | 100%          | 86                                                     | 321.3 <sup>ac</sup> | 254.4        | 405.7        | 100%          |
| N-Acetyl-S-(2-carbamoylethyl)-L-cysteine (AAMA) (Acrylamide)           | 546                                                     | 157.3 <sup>bd</sup>  | 147.8        | 167.3        | 100%          | 86                                                     | 89.79 <sup>ac</sup> | 77.16        | 104.5        | 100%          |

|                                                                                               |     |                       |        |        |      |    |                      |       |        |      |
|-----------------------------------------------------------------------------------------------|-----|-----------------------|--------|--------|------|----|----------------------|-------|--------|------|
| N-Acetyl-S-(N-methylcarbamoyl)-L-cysteine (AMCA) (N,N-Dimethylformamide/isocyanates)          | 547 | 641.7 <sup>bd</sup>   | 600.4  | 685.9  | 100% | 86 | 277.7 <sup>ac</sup>  | 228.4 | 337.6  | 100% |
| N-Acetyl-S-(benzyl)-L-cysteine (BMA) (Toluene)                                                | 547 | 7.459                 | 6.826  | 8.151  | 100% | 85 | 7.494                | 6.032 | 9.31   | 100% |
| N-Acetyl-S-(2-carboxyethyl)-L-cysteine (CEMA) (Acrolein)                                      | 527 | 342.0 <sup>bd</sup>   | 318.5  | 367.3  | 100% | 84 | 166.0 <sup>ac</sup>  | 136.2 | 202.2  | 100% |
| N-Acetyl-S-(1-cyano-2-hydroxyethyl)-L-cysteine (CYHA) (Acrylonitrile)                         | 548 | 32.30 <sup>abd</sup>  | 29.26  | 35.66  | 97%  | 86 | 7.451 <sup>ac</sup>  | 5.354 | 10.37  | 65%  |
| N-Acetyl-S-(2-cyanoethyl)-L-cysteine (CYMA) (Acrylonitrile)                                   | 548 | 194.9 <sup>bd</sup>   | 177.7  | 213.8  | 100% | 86 | 33.99 <sup>ac</sup>  | 22.84 | 50.6   | 99%  |
| N-Acetyl-S-(3,4-dihydroxybutyl)-L-cysteine (DHBM) (1,3-Butadiene)                             | 527 | 561.4 <sup>bd</sup>   | 537.3  | 586.6  | 100% | 82 | 430.6 <sup>c</sup>   | 399.6 | 464.1  | 100% |
| N-Acetyl-S-(2-carbamoyl-2-hydroxyethyl)-L-cysteine (GAMA) (Acrylamide)                        | 509 | 19.81 <sup>bd</sup>   | 18.6   | 21.09  | 76%  | 81 | 13.45 <sup>ac</sup>  | 11.93 | 15.16  | 67%  |
| N-Acetyl-S-(2-hydroxyethyl)-L-cysteine (HEMA) (Acrylonitrile, vinyl chloride, ethylene oxide) | 499 | 3.674 <sup>bd</sup>   | 3.314  | 4.073  | 90%  | 83 | 1.707 <sup>ac</sup>  | 1.342 | 2.172  | 71%  |
| N-Acetyl-S-(2-hydroxypropyl)-L-cysteine (HPM2) (Propylene Oxide)                              | 546 | 92.23 <sup>bd</sup>   | 84.56  | 100.6  | 100% | 86 | 51.47 <sup>c</sup>   | 41.59 | 63.71  | 99%  |
| N-Acetyl-S-(3-hydroxypropyl)-L-cysteine (HPMA) (Acrolein)                                     | 546 | 1563.8 <sup>bd</sup>  | 1436.6 | 1702.2 | 100% | 86 | 551.6 <sup>ac</sup>  | 449.6 | 676.6  | 100% |
| N-Acetyl-S-(3-hydroxypropyl-1-methyl)-L-cysteine (HPMM) (Crotonaldehyde)                      | 537 | 3233.1 <sup>abd</sup> | 2975.1 | 3513.4 | 100% | 86 | 1063.7 <sup>ac</sup> | 846.4 | 1336.8 | 100% |
| N-Acetyl-S-(4-hydroxy-2-methyl-2-buten-1-yl)-L-cysteine (IPM3) (Isoprene)                     | 547 | 51.27 <sup>bd</sup>   | 46.86  | 56.09  | 99%  | 86 | 11.78 <sup>ac</sup>  | 8.454 | 16.4   | 93%  |
| Mandelic acid (MADA)                                                                          | 530 | 316.7 <sup>bd</sup>   | 298.2  | 336.4  | 99%  | 81 | 190.8 <sup>ac</sup>  | 164.5 | 221.2  | 98%  |
| N-Acetyl-S-(4-hydroxy-2-buten-1-yl)-L-cysteine (MHB3) (1,3-Butadiene)                         | 548 | 39.52 <sup>abd</sup>  | 36.46  | 42.84  | 99%  | 86 | 11.70 <sup>ac</sup>  | 9.037 | 15.15  | 100% |
| Phenylglyoxylic acid (PGHA) (Ethylbenzene, styrene)                                           | 524 | 457.9 <sup>abd</sup>  | 435.1  | 481.8  | 100% | 83 | 280.4 <sup>ac</sup>  | 245.3 | 320.5  | 100% |
| N-Acetyl-S-(phenyl)-L-cysteine (PMA) (Benzene)                                                | 548 | 1.074                 | 1.007  | 1.146  | 63%  | 86 | 1.088                | 0.928 | 1.275  | 71%  |
| 2-Thioxothiazolidine-4-carboxylic acid (TTCA) (Carbon Disulfide)                              | 510 | 22.97                 | 20.93  | 25.19  | 77%  | 83 | 21.27                | 16.46 | 27.49  | 67%  |

### Footnotes:

N reflects total number of cases included in estimate (excluding participants with results outside of quality control standards.) \*Indicates analyte with >40% of all values falling below Limit of Detection (LOD) for select group. % LOD reflects proportion among cases included in estimate.

^ Detection rates for these metabolites only apply to participants who had urinary cotinine levels greater than 20 ng/L, which is reflected in the sample size for each biomarker

Weighted estimates, geometric mean calculated by  $\exp(\text{mean of log transformed [biomarker value/creatinine value]})$ . Some VOC laboratory results were outstanding at the time these analyses were conducted, so weighted estimates may not accurately reflect values in the target population. Total Nicotine Equivalents (TNE2) calculated by taking molar sum of trans-3'-hydroxycotinine and cotinine divided by urinary creatinine. Geometric means expressed to four significant figures if under 1000; geometric means over 1000 expressed to five significant figures.

Red text denotes values with RSE>30% or denominator <50. Superscript letters denote statistically significant differences between dual user groups based on results from linear regression models adjusted for urinary creatinine, CPD, age, sex, ethnicity, education, SHS exposure, past 30 day marijuana use, and tobacco use status ( $p < 0.05$ ).

\$ VOC information presented as Biomarker Name (Lab Code) (Parent Compound)

## eReferences

1. Li Z, Romanoff L, Bartell S, et al. Excretion Profiles and Half-Lives of Ten Urinary Polycyclic Aromatic Hydrocarbon Metabolites after Dietary Exposure. *Chemical research in toxicology*. 2012;25(7):1452-1461.
2. Bernert JT, Harmon TL, Sosnoff CS, McGuffey JE. Use of cotinine immunoassay test strips for preclassifying urine samples from smokers and nonsmokers prior to analysis by LC-MS-MS. *Journal of analytical toxicology*. 2005;29(8):814-818.
3. Wei B, Feng J, Rehmani IJ, et al. A high-throughput robotic sample preparation system and HPLC-MS/MS for measuring urinary anatabine, anabasine, nicotine and major nicotine metabolites. *Clinica chimica acta; international journal of clinical chemistry*. 2014;436:290-297.
4. Caldwell KL, Jones RL, Verdon CP, Jarrett JM, Caudill SP, Osterloh JD. Levels of urinary total and speciated arsenic in the US population: National Health and Nutrition Examination Survey 2003-2004. *Journal of exposure science & environmental epidemiology*. 2009;19(1):59-68.
5. Verdon CP, Caldwell KL, Fresquez MR, Jones RL. Determination of seven arsenic compounds in urine by HPLC-ICP-DRC-MS: a CDC population biomonitoring method. *Analytical and bioanalytical chemistry*. 2009;393(3):939-947.
6. Goniewicz ML, Havel CM, Peng MW, et al. Elimination kinetics of the tobacco-specific biomarker and lung carcinogen 4-(methylnitrosamino)-1-(3-pyridyl)-1-butanol. *Cancer epidemiology, biomarkers & prevention : a publication of the American Association for Cancer Research, cosponsored by the American Society of Preventive Oncology*. 2009;18(12):3421-3425.
7. Xia B, Xia Y, Wong J, et al. Quantitative analysis of five tobacco-specific N-nitrosamines in urine by liquid chromatography-atmospheric pressure ionization tandem mass spectrometry. *Biomedical chromatography : BMC*. 2014;28(3):375-384.
8. Caldwell KL, Hartel J, Jarrett J, Jones RL. Inductively coupled plasma mass spectrometry to measure multiple toxic elements in urine in NHANES 1999-2000. *Atomic Spectroscopy*. 2005;26(1):1-7.
9. Jarrett JM, Xiao G, Caldwell KL, Henahan D, Shakirova G, Jones RL. Eliminating molybdenum oxide interference in urine cadmium biomonitoring using ICP-DRC-MS. *Journal of Analytical Atomic Spectrometry*. 2008;23(7):962.
10. St Helen G, Goniewicz ML, Dempsey D, Wilson M, Jacob P, 3rd, Benowitz NL. Exposure and kinetics of polycyclic aromatic hydrocarbons (PAHs) in cigarette smokers. *Chemical research in toxicology*. 2012;25(4):952-964.
11. Wang Y, Meng L, Pittman EN, et al. Quantification of urinary mono-hydroxylated metabolites of polycyclic aromatic hydrocarbons by on-line solid phase extraction-high performance liquid chromatography-tandem mass spectrometry. *Analytical and bioanalytical chemistry*. 2017;409(4):931-937.
12. Alwis KU, Bailey TL, Patel D, Wang L, Blount BC. Measuring urinary N-acetyl-S-(4-hydroxy-2-methyl-2-buten-1-yl)-L-cysteine (IPMA3) as a potential biomarker of isoprene exposure. *Analitica chimica acta*. 2016;941:61-66.
13. Alwis KU, Blount BC, Britt AS, Patel D, Ashley DL. Simultaneous analysis of 28 urinary VOC metabolites using ultra high performance liquid chromatography coupled with electrospray ionization tandem mass spectrometry (UPLC-ESI/MSMS). *Analitica chimica acta*. 2012;750:152.
